# Supplementary material
Source: PubMed Central journal article supplement (PMC11107659)
Supplement: 18_2016_2377_MOESM1_ESM.pdf [file 18_2016_2377_MOESM1_ESM.pdf]

## Supplementary Information

### **microRNA-122 target sites in the Hepatitis C Virus RNA NS5B coding region and 3'untranslated region: function in replication and influence of RNA secondary structure**

Gesche K. Gerresheim (1)#, Nadia Dünnes (1)#, Anika Nieder-Röhrmann (1), Lyudmila A. Shalamova (1), Markus Fricke (2), Ivo Hofacker (4), Christian Höner zu Siederdisen (4,5), Manja Marz (2,3), and Michael Niepmann (1)\*

(1) Institute of Biochemistry, Faculty of Medicine, Justus-Liebig-University, 35392 Giessen, Germany; (2) Faculty of Mathematics and Computer Science, Friedrich-Schiller-University, 07743 Jena, Germany; (3) FLI Leibniz Institute for Age Research; 07743 Jena, Germany; (4) Institute for Theoretical Chemistry, University of Vienna, 1090 Vienna, Austria; (5) Bioinformatics Group, Department of Computer Science, and Interdisciplinary Center for Bioinformatics, Universität Leipzig, 04107 Leipzig, Germany

# These authors contributed equally to this work

\* Corresponding author. E-mail: [michael.niepmann@biochemie.med.uni-giessen.de](mailto:michael.niepmann@biochemie.med.uni-giessen.de)

Address: Institute of Biochemistry, Faculty of Medicine, Justus-Liebig-University, Friedrichstrasse 24, 35392 Giessen, Germany

**Running head:** miR-122/Ago2 binding in coding region and 3'UTR of HCV

**Keywords:** microRNA, accessibility, Ago2, translation

**Supplementary Figure S1 (next page), related to Figure 1**

miR-122 and the conserved miR-122 target site 5B.2 in 106 selected HCV NS5B sequences (Fricke et al. 2015). The miR-122 sequence with the seed sequence (nts 2 – 8) and the supplementary binding region (nts 14 – 20) are marked in red. Gaps were introduced to align seed target sequences. HCV genotype and NCBI nucleotide database accession numbers are given on the left, nucleotide numbers are shown for each isolate. The miR-122 seed target site (A)CACUCC is 100 % conserved in 99 of 106 isolates, the supplementary binding site is conserved in all isolates. Below the sequences, the histogram shows the conservation of each residue.

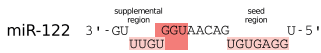

|                |           |                                       |   |                                |      |
|----------------|-----------|---------------------------------------|---|--------------------------------|------|
| 1a_EF621489.1  | 8776      | UCGCGCGGGCGCGUGGGGAGACAGCAAGACACACUCC | - | AGUCAAUCCUGGCUAGGCAACA         | 8835 |
| 1a_AB520610.1  | 8776      | UCGCGAGGCGCGUGGGGAGACAGCAAGACACACUCC  | - | AGUCAAUCCUGGCUAGGCAACA         | 8835 |
| 1b_AJ238799.1  | 8773      | UUGCGCGGGCGUGGGGAGACAGCAAGACACACUCC   | - | AGUCAAUCCUGGCUAGGCAACA         | 8832 |
| 1b_AY460204.1  | 8776      | UCGCGCGGGCGUGGGGAGACAGCAAGACACACUCC   | - | AGUCAAUCCUGGCUAGGCAACA         | 8835 |
| 1c_AY651061.1  | 8776      | UCGCGCGGGCGUGGGGAGACAGCAAGACACACUCC   | - | AGUGAACUCCUGGCUAGGCAACA        | 8835 |
| 1c_HPCCGS      | 8776      | UCGCGCGGGCGUGGGGAGACAGCAAGACACACUCC   | - | AGUGAACUCCUGGCUAGGCAACA        | 8835 |
| 1e_KC248194.1  | 8787      | UCGCGCGGGCGUGGGGAGACAGCAAGACACACUCC   | - | AAUCAACUCCUGGCUAGGCAACA        | 8846 |
| 1g_AM910652.2  | 8760      | UCGCGCGGGCGUGGGGAGACAGCAAGACACACUCC   | - | UGUUAACUCCUGGCUAGGCAACA        | 8819 |
| 1h_KC248198.1  | 8779      | UCGCGCGGGCGUGGGGAGACAGCAAGACACACUCC   | - | AGUGAACUCCUGGCUAGGCAACA        | 8838 |
| 1h_KC248199.1  | 8779      | UCGCGCGGGCGUGGGGAGACAGCAAGACACACUCC   | - | AGUAAACUCCUGGCUAGGCAACA        | 8838 |
| 1l_KC248196.1  | 8795      | UCGCGCGGGCGUGGGGAGACAGCAAGACACACUCC   | - | AGUUAACUCCUGGCUAGGCAACA        | 8854 |
| 2a_AF177036.1  | 8841      | UCGCCCGGGCGUGGGGAAACAGUUAAG           | - | ACACUCCUUGCAAUUCUAGGCUAGGAAACA | 8900 |
| 2a_AB047639.1  | JFH1 8841 | UCGCCCGGGCGUGGGGAAACAGUUAAG           | - | ACACUCCUUGCAAUUCUAGGCUAGGAAACA | 8900 |
| 2b_AB030907.1  | 8842      | UCACCCGAGCGUGGGGAAACAGUUAAG           | - | ACACUCCUUGCAAUUCUAGGCUAGGCAACA | 8901 |
| 2b_QJ745651.1  | 8842      | UCACCCGAGCGUGGGGAAACAGUUAAG           | - | ACACUCCUUGCAAUUCUAGGCUAGGCAACA | 8901 |
| 2c_D50409.1    | 8853      | UCGCCAGGGCGUGGGGAGACAGCAAG            | - | ACACUCCUUGCAAUUCUAGGCUAGGAAACA | 8912 |
| 2c_XJ227965.1  | 8764      | UCGCCAGGGCGUGGGGAGACAGCAAG            | - | ACACUCCUUGCAAUUCUAGGCUAGGCAACA | 8823 |
| 2d_JF735114.1  | 8841      | UCGCCAGGGCGUGGGGAGACAGCAAG            | - | ACACUCCUUGCAAUUCUAGGCUAGGAAACA | 8900 |
| 2e_JF735120.1  | 9057      | UCGCCAGGGCGUGGGGAAACAGUGAA            | - | GCACUCCUUGCAAUUCUAGGCUAGGAAACA | 9116 |
| 6g_DQ314806.1  | 8806      | UGGCCGGGGCGUGGGGAAACUGCUCGACACACUCC   | - | AGUCAAUCCUGGCUAGGCAACA         | 8865 |
| 6g_HPCJK046E2  | 8806      | UAGCCCGGGCGUGGGGAAACUGCUCGACACACUCC   | - | CGUGAAUCCUGGCUAGGCAACA         | 8865 |
| 2i_DJ055561    | 8811      | UCGCCAGGGCGUGGGGAGACCCGCAAG           | - | ACACUCCUUGCAAUUCUAGGCUAGGAAACA | 8870 |
| 2j_JF735113.1  | 8841      | UUGCCAGGACGCCUGGGGAAACUGCAA           | - | GCACUCCCGUCAUUCUAGGCUAGGAAAU   | 8900 |
| 2j_HM777359.1  | 8761      | UCGCCAGGACGCCUGGGGAAACUGUAA           | - | GCACUCCUUGCAAUUCUAGGCUAGGAAACA | 8820 |
| 2k_AB031663.1  | 8842      | UCGCCAGGGCGUGGGGAGACAGCUAG            | - | ACACUCCUUGCAAUUCUAGGCUAGGAAACA | 8901 |
| 2k_JF735118.1  | 8841      | UUGCCAGGGCGUGGGGAAACAGUCAG            | - | ACACUCCUUGCAAUUCUAGGCUAGGAAACA | 8900 |
| 2m_JF735111.1  | 8844      | UAGCCAGGGCGUGGGGAAACAGCUAG            | - | ACACUCCUUGCAAUUCUAGGCUAGGAAACA | 8903 |
| 2m_XJ227968.1  | 8766      | UUGCCAGGGCGUGGGGAAACAGCUAG            | - | ACACUCCCGUCAUUCUAGGCUAGGAAAU   | 8825 |
| 2q_FN666429    | 8814      | UCGCCAGGGCGUGGGGAGACAGUCAG            | - | ACACUCCUUGCAAUUCUAGGCUAGGAAACA | 8873 |
| 2q_FN666428    | 8814      | UCGCCAGGGCGUGGGGAGACAGUCAG            | - | ACACUCCUUGCAAUUCUAGGCUAGGAAACA | 8873 |
| 3a_AB91596.1   | 8804      | UGGCCGUGGGCGUGGGGAAACAGUCGUCACACUCC   | - | AGUUAACUCCUGGCUAGGCAACA        | 8863 |
| 3a_AB792683.1  | 8804      | UGGCCGUGGGCGUGGGGAAACAGUCGUCACACUCC   | - | AGUUAACUCCUGGCUAGGCAACA        | 8863 |
| 3b_HPCFC       | 8810      | UAGCCCGUGGGCGUGGGGAGACUGCUCGACACUCC   | - | AGUUAACUCCUGGCUAGGAAAU         | 8869 |
| 3g_JF735123.1  | 8813      | UGGCCGAGCGUGGGGAAACCGCACGACACUCC      | - | AGUUAACUCCUGGCUAGGAAAU         | 8872 |
| 3g_XJ227954.1  | 8732      | UGGCCGUGGGCGUGGGGAAACAGCAGUCACACUCC   | - | AGUUAACUCCUGGCUAGGAAAU         | 8791 |
| 3h_JF735121.1  | 8798      | UUGCCGUGGGCGUGGGGAAACAGUCAGACACUCC    | - | GGUGAAUCCUGGCUAGGCAACA         | 8857 |
| 3h_JF735124.1  | 8804      | UCGCCGCGGGCGUGGGGAGACCCGCAAGACACAC    | - | AGUCAACUCCUGGCUAGGCAACA        | 8863 |
| 3i_FJ407092.1  | 8805      | UCGCCGUGGGCGUGGGGAGACUGCUCGACACUCC    | - | GGUAAACUCCUGGCUAGGCAACA        | 8864 |
| 3i_JF735125.1  | 8805      | UGGCCGUGGGCGUGGGGAGACUGCUCGACACUCC    | - | GGUAAACUCCUGGCUAGGCAACA        | 8864 |
| 3k_HPCJK049E1  | 8798      | UGGCCGCGGGCGUGGGGAGACUGCCGACACACUCC   | - | AGUUAACUCCUGGCUAGGAAAU         | 8857 |
| 3k_JF735122.1  | 8798      | UAGCCCGGGCGUGGGGAGACUGCUCGACACUCC     | - | AGUUAACUCCUGGCUAGGAAAU         | 8857 |
| 4a_AB795432.1  | 8767      | UGGCCGAGCGCGUGGGGAGACAGUCGACACACUCC   | - | AGUCAAUCCUGGCUAGGAAACA         | 8826 |
| 4a_Y11604      | 8705      | UGGCCGAGCGUGGGGAGACAGUCGACACACUCC     | - | AGUCAAUCCUGGCUAGGAAACA         | 8764 |
| 4b_FJ025856    | 8625      | UGGCCGAGCGCGUGGGGAGACAGUCGACACACUCC   | - | AGUGAACUCCUGGCUAGGCAACA        | 8684 |
| 4b_FJ462435.1  | 8775      | UCGCCGCGGGCGUGGGGAAACAGUCGACACACUCC   | - | GGUUAACUCCUGGCUAGGCAACA        | 8834 |
| 4c_FJ462436.1  | 8808      | UGGCCGAGCGCGUGGGGAGACAGUCGACACACUCC   | - | AGUCAAUCCUGGCUAGGAAACA         | 8867 |
| 4d_DQ516083    | 8699      | UGGCCGCGGGCGUGGGGAGACAGUCGACACACUCC   | - | AGUCAACUCCUGGCUAGGCAACA        | 8758 |
| 4d_FJ462437.1  | 8760      | UGGCCGCGGGCGUGGGGAGACAGUCGACACACUCC   | - | AGUCAACUCCUGGCUAGGCAACA        | 8819 |
| 4f_EF589160    | 8704      | UCGCCAGAGCGUGGGGAGACAGCCAGACACACUCC   | - | AGUCAACUCCUGGCUAGGAAACA        | 8763 |
| 4f_EF589161    | 8706      | UCGCCAGAGCGCGUGGGGAAACAGCCAGACACACUCC | - | AGUCAACUCCUGGCUAGGAAACA        | 8765 |
| 4g_FJ462432.1  | 8767      | UGGCCAGGACGCCUGGGGAAACAGUCGACACACUCC  | - | AGUCAAUCCUGGCUAGGCAACA         | 8826 |
| 4g_XJ227963.1  | 8686      | UGGCCAGGACGCCUGGGGAAACUGCUCGACACACUCC | - | AGUUAUCCUGGCUAGGCAACA          | 8745 |
| 4k_FJ462438.1  | 8776      | UGGCCAGGACGCCUGGGGAAACAGUCGACACACUCC  | - | AGUCAACUCCUGGCUAGGAAAU         | 8835 |
| 4k_EU392173    | 8698      | UGGCCAGGACGCCUGGGGAAACAGUCGACACACUCC  | - | AGUCAACUCCUGGCUAGGAAAU         | 8757 |
| 4L_XJ227957.1  | 8689      | UGGCCAGGCGUGGGGAGACAGUCGACACACUCC     | - | GGUAAAUCCUGGCUAGGAAACA         | 8748 |
| 4l_FJ839870.1  | 8760      | UGGCCAGGCGCGUGGGGAGACAGUCGACACACUCC   | - | GGUAAAUCCUGGCUAGGAAACA         | 8819 |
| 4m_XJ227961.1  | 8682      | UGGCCAGGCGUGGGGAGACAGUCGACACACUCC     | - | AGUCAAUCCUGGCUAGGAAACA         | 8741 |
| 4n_FJ462433.1  | 8761      | UGGCCAGGCGUGGGGAGACAGUCGACACACUCC     | - | AGUCAAUCCUGGCUAGGAAACA         | 8820 |
| 4n_XJ227970.1  | 8695      | UGGCCAGGACGCCUGGGGAGACAGUCGACACACUCC  | - | AGUCAAUCCUGGCUAGGAAAU          | 8744 |
| 4n_FJ462441.1  | 8766      | UGGCCGAGCGCGUGGGGAGACAGUCGACACACUCC   | - | AGUCAACUCCUGGCUAGGAAACA        | 8825 |
| 4o_FJ462440.1  | 8758      | UGGCCAGGCGCGUGGGGAAACAGUCGACACACUCC   | - | AGUCAACUCCUGGCUAGGCAACA        | 8817 |
| 4o_XJ227977.1  | 8668      | UGGCCAGGCGUGGGGAAACAGUCGACACACUCC     | - | GGUCAAUCCUGGCUAGGCAACA         | 8727 |
| 4q_FJ462434.1  | 8773      | UGGCCAGGCGUGGGGAGACAGUCGACACACUCC     | - | AGUCAACUCCUGGCUAGGAAACA        | 8832 |
| 4p_FJ462431.1  | 8763      | UGGCCAGGCGCGUGGGGAGACAGCCCGCACACUCC   | - | AGUGAAUCCUGGCUAGGAAACA         | 8822 |
| 4r_FJ839869.1  | 8763      | UGGCCAGGCGCGUGGGGAGACAGCCCGCACACUCC   | - | AGUAAACUCCUGGCUAGGAAACA        | 8822 |
| 4r_FJ462439.1  | 8775      | UGGCCAGGCGCGUGGGGAGACAGUCGACACACUCC   | - | AGUCAAUCCUGGCUAGGAAACA         | 8834 |
| 4r_XJ227962.1  | 8700      | UGGCCAGGCGUGGGGAGACAGUCGACACACUCC     | - | AGUCAAUCCUGGCUAGGAAACA         | 8759 |
| 4v_XJ227959.1  | 8696      | UGGCCGCGGGCGUGGGGAAACAGUCGACACACUCC   | - | AGUUAUCCUGGCUAGGAAACA          | 8755 |
| 4v_HQ537009    | 8682      | UGGCCGCGGGCGUGGGGAAACAGUCGACACACUCC   | - | AGUUAUCCUGGCUAGGAAACA          | 8741 |
| 5a_NC_009826   | 8723      | UUGCGAAGGCGUGGGGAAACUGCCAA            | - | ACACUCCCGUAAUUCUAGGCUAGGAAACA  | 8782 |
| 5a_AF064490    | 8690      | UUGCGAGGGCGUGGGGAGACUGCUAA            | - | ACACUCCCGUAAUUCUAGGCUAGGAAACA  | 8749 |
| 6a_AY859526.1  | 8754      | UUGCGGGGGCGUGGGGAGACAGCCCGCACACUCC    | - | AGUCAAUCCUGGCUAGGCAACA         | 8813 |
| 6a_DQ480524.1  | 8760      | UAGCGCGGGCGUGGGGAGACAGCCCGCACACUCC    | - | AGUCAAUCCUGGCUAGGCAACA         | 8819 |
| 6b_NC_009827.1 | 8801      | UUGCGGAGCGUGGGGAGACAGUCGACACACUCC     | - | UGUCAAUCCUGGCUAGGCAACA         | 8860 |
| 6b_D84262.2    | 8801      | UUGCGGAGCGUGGGGAGACAGUCGACACACUCC     | - | UGUCAAUCCUGGCUAGGCAACA         | 8860 |
| 6c_EF424629.1  | 8786      | UCUCACGAGCGUGGGGAAACAGUCGACACACUCC    | - | AGUUAACUCCUGGCUAGGCAACA        | 8845 |
| 6d_D84263.2    | 8779      | UGUCUCGGCGUGGGGAAACAGCCGACACACUCC     | - | CGUUAACUCCUGGCUAGGCAACA        | 8838 |
| 6e_EU408326    | 8806      | UUUCUGGAGCGCGUGGGGAAACCGCCGACACACUCC  | - | GGUAAUCCUGGCUAGGCAACA          | 8865 |
| 6e_DQ314805.1  | 8806      | UUUCUGGAGCGCGUGGGGAAACCGCCGACACACUCC  | - | GGUAAUCCUGGCUAGGCAACA          | 8865 |
| 6f_DQ835764.1  | 8794      | UGACGCGGAGCGUGGGGAAACAGCCCGCACACUCC   | - | AGUGAAUCCUGGCUAGGCAACA         | 8853 |
| 6f_DQ835760.1  | 8794      | UGUCGCGGAGCGUGGGGAAACAGCCCGCACACUCC   | - | AGUGAAUCCUGGCUAGGCAACA         | 8853 |
| 6h_D84265.2    | 8785      | UGGCCAGGGCGUGGGGAGACCCGUCGACACUCC     | - | UGUGAAUCCUGGCUAGGCAACA         | 8844 |
| 6i_DQ835762.1  | 8788      | UUGCCAGGAGCGUGGGGAGACUGCCGACACUCC     | - | AGUCAACUCCUGGCUAGGAAACA        | 8847 |
| 6i_DQ835770.1  | 8788      | UUGCCAGGAGCGUGGGGAGACUGCCGACACUCC     | - | AGUUAACUCCUGGCUAGGAAACA        | 8847 |
| 6j_DQ835769.1  | 8788      | UUGCCAGGAGCGUGGGGAGACUGUCGACACUCC     | - | AGUAAACUCCUGGCUAGGAAACA        | 8847 |
| 6j_DQ835761.1  | 8788      | UUGCCAGGAGCGUGGGGAGACUGUCGACACUCC     | - | AGUAAACUCCUGGCUAGGAAACA        | 8847 |
| 6k_JX183552.1  | 8788      | UAUCUCGGCGUGGGGAGACAGCCGACACACUCC     | - | AGUCAACUCCUGGCUAGGAAAU         | 8847 |
| 6k_D84264.2    | 8788      | UGUCACGAGCGUGGGGAGACAGUCGACACACUCC    | - | AGUAAUCCUGGCUAGGAAACA          | 8847 |
| 6l_JX183554.1  | 8788      | UAGCCGAGCGUGGGGAGACAGUCGACACACUCC     | - | AGUGAACUCCUGGCUAGGAAACA        | 8847 |
| 6l_EF424628.1  | 8788      | UAGCCGAGCGUGGGGAGACAGUCGACACACUCC     | - | AGUGAACUCCUGGCUAGGAAAU         | 8847 |
| 6m_DQ835765.1  | 8788      | UAGCCGCGGAGCAUGGGGAGACUGCGGCAUAUCC    | - | AGUCAACUCCUGGCUAGGAAACA        | 8847 |
| 6m_DQ835767.1  | 8788      | UAGCCGCGGAGCAUGGGGAGACCGCGGCAUAUCC    | - | AGUCAACUCCUGGCUAGGAAACA        | 8847 |
| 6n_DQ835768.1  | 8785      | UGGCCAGGAGCGUGGGGAGACUGCCGACACUCC     | - | AGUGAAUCCUGGCUAGGAAACA         | 8844 |
| 6n_EU246937    | 8760      | UCUCACGGGCGUGGGGAAACAGCCCGCACACUCC    | - | AGUGAAUCCUGGCUAGGAAACA         | 8819 |
| 6o_EF424627.1  | 8788      | UUUCACGGGCGUGGGGAAACAGCCCGCACACUCC    | - | AGUGAAUCCUGGCUAGGAAACA         | 8847 |
| 6o_EU408327    | 8788      | UUUCACGGGCGUGGGGAAACAGCCCGCACACUCC    | - | AGUGAAUCCUGGCUAGGAAACA         | 8847 |
| 6p_EF424626.1  | 8789      | UGACACGUGCGUGGGGAAACAGCCGACACUCC      | - | AGUGAAUCCUGGCUAGGCAACA         | 8848 |
| 6q_EF424625.1  | 8786      | UGGUCGAGCGUGGGGAAACAGCCGCAUAUCC       | - | AGUCAAUCCUGGCUAGGAAACA         | 8845 |
| 6r_EU408328    | 8788      | UGACACGAGCGUGGGGAAACAGCCGACACUCC      | - | AGUGAACUCCUGGCUAGGCAACA        | 8847 |
| 6s_EU408329    | 8788      | UGGCGGGGCGUGGGGAAACCGCUCGACACGCC      | - | GGUCAAUCCUGGCUAGGAAACA         | 8847 |
| 6t_EF632070.1  | 8788      | UAUCCGGGCGCGUGGGGAAACGGCCCGCACACUCC   | - | AGUAAACUCCUGGCUAGGAAACA        | 8847 |
| 6t_EF632069.1  | 8788      | UAUCCGGGCGCGUGGGGAAACGGCCCGCACACUCC   | - | AGUGAACUCCUGGCUAGGAAACA        | 8847 |
| 6u_EU246940    | 8786      | UGGCCGGGCGCGUGGGGAAACCGCCGACACUCC     | - | AGUGAACUCCUGGCUAGGAAACA        | 8825 |
| 6v_FJ435090.1  | 8788      | UUGCCGCGGGCGUGGGGAGACAGCCGACACUCC     | - | AGUAAACUCCUGGCUAGGAAACA        | 8847 |
| 6v_EU798760    | 8788      | UUGCCGCGGGCGUGGGGAGACAGCCGACACUCC     | - | AGUAAACUCCUGGCUAGGAAACA        | 8847 |
| 7a_EF108306    | 8749      | UAUCCAGGCGAGUGGGGAGACCGCCGACACUCC     | - | UGUAAACUCCUGGCUAGGCAACA        | 8808 |

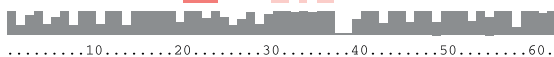

**Supplementary Figure S2 (next page), related to Figure 1**

miR-122 and the conserved miR-122 target site 5B.3 in 106 selected HCV NS5B sequences (Fricke et al. 2015). The miR-122 seed sequence (nts 2 – 7) is marked in light red. Nucleotides of the supplementary binding region (involving nucleotides 14 – 20) are marked in light red, dark red or orange, respectively, as the corresponding HCV target sequences. HCV genotype and NCBI nucleotide database accession numbers are given on the left, nucleotide numbers are shown for each isolate. Both the miR-122 seed target site and the supplementary binding site are conserved in all isolates. Below the sequences, the histogram shows the conservation of each residue.

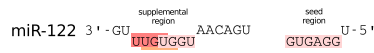

1a\_EF621489.1 9180 AACUGGGCAGUAAAGGACAAAGCUCUAAACUCACUCCAAUAGCGGCCGUGG 9229  
1a\_AB520610.1 9180 AAUUGGGCAGUAAAGGACAAAGCUCUAAACUCACUCCAAUAGCGGCCGUGG 9229  
1b\_AJ238799.1 Con1 9177 AACUGGGCAGUAAAGGACAAAGCUCUAAACUCACUCCAAUAGCGGCCGUGG 9226  
1b\_AY460204.1 9180 AACUGGGCAGUAAAGGACAAAGCUCUAAACUCACUCCAAUAGCGGCCGUGG 9229  
1c\_AY651061.1 9180 AACUGGGCGGUGAAAACCAACUCUAAACUCACUCCAAUAGCGGCCGUGG 9229  
1c\_HPCOGS 9180 AACUGGGCGGUGAAAACCAACUCUAAACUCACUCCAAUAGCGGCCGUGG 9229  
1e\_KC248194.1 9191 AACUGGGCAGUAAAGGACAAACUCUAAACUCACUCCAAUAGCGGCCGUGG 9240  
1g\_AM910652.2 9164 AACUGGGCGGUGAAAACCAAGCUCUAAACUCACUCCAAUAGCGGCCGUGG 9233  
1h\_KC248198.1 9183 AACUGGGCAGUAAAGGACAAAGCUCUAAACUCACUCCAAUAGCGGCCGUGG 9226  
1h\_KC248199.1 9183 AACUGGGCAGUAAAGGACAAAGCUCUAAACUCACUCCAAUAGCGGCCGUGG 9232  
1l\_KC248196.1 9199 AACUGGGCAGUGAGAACAAAGCUCAGACUCACUCCAAUAGCGGCCGUGG 9248  
2a\_AF177036.1 9245 AAUUGGGCGGUGAAGACCAAGCUCUAAACUCACUCCAAUAGCGGCCGUGG 9294  
2a\_AB047639.1 JFH1 9245 AAUUGGGCGGUGAAGACCAAGCUCUAAACUCACUCCAAUAGCGGCCGUGG 9294  
2b\_AB030907.1 9246 AACUGGGCGGUGAAGGACAAAGCUCUAAACUCACUCCAAUAGCGGCCGUGG 9295  
2b\_JQ745651.1 9246 AACUGGGCGGUGAAGGACAAAGCUCUAAACUCACUCCAAUAGCGGCCGUGG 9295  
2c\_DS0409.1 9257 AACUGGGCUGUGAGGACCAAGCUCUAAACUCACUCCAAUAGCGGCCGUGG 9306  
2c\_JX227965.1 9168 AACUGGGCUGUGAAGGACCAAGCUCUAAACUCACUCCAAUAGCGGCCGUGG 9217  
2d\_JF735114.1 9245 AACUGGGCGGUGAAGGACAAAGCUCUAAACUCACUCCAAUAGCGGCCGUGG 9294  
2e\_JF735120.1 9461 AAUUGGGCAGUGAGGACAAAGCUCUAAACUCACUCCAAUAGCGGCCGUGG 9510  
6g\_DQ314806.1 9210 AACUGGGCCGUAAAACCAAGCUCUAAACUCACUCCAAUAGCGGCCGUGG 9259  
6g\_HPCJK046E2 9210 AACUGGGCCGUAAAACCAAGCUCUAAACUCACUCCAAUAGCGGCCGUGG 9259  
2i\_DQ155561 9215 AACUGGGCGGUGAAGGACAAAGCUCUAAACUCACUCCAAUAGCGGCCGUGG 9264  
2j\_JF735113.1 9245 AACUGGGCAGUAAAGGACCAAGCUCAGACUCACUCCAAUAGCGGCCGUGG 9294  
2j\_HM777359.1 9165 AACUGGGCAGUAAAGGACAAACUCAGACUCACUCCAAUAGCGGCCGUGG 9214  
2k\_AB031663.1 9246 AACUGGGCGGUGAGAACAAAGCUCUAAACUCACUCCAAUAGCGGCCGUGG 9295  
2k\_JF735118.1 9245 AACUGGGCGGUGAAGGACAAAGCUCUAAACUCACUCCAAUAGCGGCCGUGG 9294  
2m\_JF735111.1 9248 AACUGGGCGGUGAAGGACCAAGCUCUAAACUCACUCCAAUAGCGGCCGUGG 9297  
2m\_JX227968.1 9170 AACUGGGCGGUGAAAACCAAGCUCUAAACUCACUCCAAUAGCGGCCGUGG 9219  
2q\_FN666429 9218 AACUGGGCGGUGAAAACCAAGCUCAGACUCACUCCAAUAGCGGCCGUGG 9267  
2q\_FN666428 9218 AACUGGGCGGUGAAAACCAAGCUCUAAACUCACUCCAAUAGCGGCCGUGG 9267  
3a\_AB691596.1 9208 AACUGGGCAGUACGCACCAAGCUCUAAACUCACUCCAAUAGCGGCCGUGG 9257  
3a\_AB792683.1 9208 AAUUGGGCGGUGACGCACCAAGCUCUAAACUCACUCCAAUAGCGGCCGUGG 9257  
3b\_HPCFG 9214 AACUGGGCAGUGCGCACCAAAACCAACUCACUCCAAUAGCGGCCGUGG 9263  
3g\_JF735123.1 9217 AACUGGGCGGUGACGCACCAAAACCAACUCACUCCAAUAGCGGCCGUGG 9266  
3g\_JX227954.1 9136 AACUGGGCGGUGACGCACCAAAUAAAACUCACUCCAAUAGCGGCCGUGG 9185  
3h\_JF735121.1 9202 AACUGGGCUGUACGGACAAAGCUCUAAACUCACUCCAAUAGCGGCCGUGG 9250  
3h\_JF735124.1 9208 AAUUGGGCUGUACGGACAAAGCUCUAAACUCACUCCAAUAGCGGCCGUGG 9257  
3i\_FJ407092.1 9209 AACUGGGCGGUGACGCACCAAAACCAACUCACUCCAAUAGCGGCCGUGG 9258  
3i\_JF735125.1 9209 AACUGGGCGGUGACGCACCAAAACCAACUCACUCCAAUAGCGGCCGUGG 9258  
3k\_HPCJK049E1 9202 AACUGGGCAGUGCGCACAAAGCUCUAAACUCACUCCAAUAGCGGCCGUGG 9251  
3k\_JF735122.1 9202 AAUUGGGCAGUGCGCACAAAGCUCUAAACUCACUCCAAUAGCGGCCGUGG 9251  
4a\_AB795432.1 9171 AACUGGGCAGUAAAACCAAGCUCUAAACUCACUCCAAUAGCGGCCGUGG 9120  
4a\_Y11604 9109 AACUGGGCGGUGAAAACCAACUCUAAACUCACUCCAAUAGCGGCCGUGG 9258  
4b\_FJ025856 9029 AACUGGGCGGUGAAAACCAAGCUCUAAACUCACUCCAAUAGCGGCCGUGG 9078  
4b\_FJ462435.1 9179 AACUGGGCGGUGAAGGACCAAGCUCUAAACUCACUCCAAUAGCGGCCGUGG 9228  
4c\_FJ462436.1 9212 AACUGGGCGGUGAAAACCAACUCUAAACUCACUCCAAUAGCGGCCGUGG 9261  
4d\_DQ516083 9103 AACUGGGCGGUGAAAACCAAGCUCUAAACUCACUCCAAUAGCGGCCGUGG 9152  
4d\_FJ462437.1 9164 AACUGGGCGGUGAAAACCAAGCUCUAAACUCACUCCAAUAGCGGCCGUGG 9213  
4f\_EF589160 9108 AACUGGGCGGUGAAAACCAAGCUCUAAACUCACUCCAAUAGCGGCCGUGG 9157  
4f\_EF589161 9110 AACUGGGCGGUGAAAACCAAAAUUAGACUCACUCCAAUAGCGGCCGUGG 9159  
4g\_FJ462432.1 9171 AACUGGGCGGUGAAAACCAAGCUCUAAACUCACUCCAAUAGCGGCCGUGG 9220  
4g\_JX227963.1 9090 AACUGGGCGGUGAAAACCAAGCUCUAAACUCACUCCAAUAGCGGCCGUGG 9139  
4k\_FJ462438.1 9180 AACUGGGCGGUGAAAACCAAGCUCUAAACUCACUCCAAUAGCGGCCGUGG 9229  
4k\_EU392173 9102 AACUGGGCGGUGAAAACCAAGCUCUAAACUCACUCCAAUAGCGGCCGUGG 9151  
4L\_JX227957.1 9093 AACUGGGCGGUGAAAACCAAGCUCUAAACUCACUCCAAUAGCGGCCGUGG 9142  
4l\_FJ839870.1 9164 AACUGGGCGGUGAAAACCAAGCUCUAAACUCACUCCAAUAGCGGCCGUGG 9213  
4m\_JX227961.1 9086 AACUGGGCGGUGAAAACCAACUCUAAACUCACUCCAAUAGCGGCCGUGG 9135  
4m\_FJ462433.1 9165 AACUGGGCGGUGAAAACCAACUCUAAACUCACUCCAAUAGCGGCCGUGG 9214  
4n\_JX227970.1 9089 AACUGGGCGGUGAAAACCAAGCUCUAAACUCACUCCAAUAGCGGCCGUGG 9138  
4n\_FJ462441.1 9170 AACUGGGCGGUGAAAACCAAGCUCUAAACUCACUCCAAUAGCGGCCGUGG 9216  
4o\_FJ462440.1 9162 AACUGGGCGGUGAAAACCAAGCUCUAAACUCACUCCAAUAGCGGCCGUGG 9211  
4o\_JX227977.1 9072 AAUUGGGCGGUGAAAACCAAGCUCUAAACUCACUCCAAUAGCGGCCGUGG 9121  
4q\_FJ462434.1 9177 AACUGGGCGGUGAAAACCAAGCUCUAAACUCACUCCAAUAGCGGCCGUGG 9226  
4p\_FJ462431.1 9167 AACUGGGCGGUGAAAACCAACUCUAAACUCACUCCAAUAGCGGCCGUGG 9216  
4t\_FJ839869.1 9167 AACUGGGCGGUGAAAACCAACUCUAAACUCACUCCAAUAGCGGCCGUGG 9216  
4r\_FJ462439.1 9179 AACUGGGCGGUGAAAACCAAGCUCUAAACUCACUCCAAUAGCGGCCGUGG 9228  
4r\_JX227962.1 9104 AACUGGGCAGUAAAACCAAGCUCUAAACUCACUCCAAUAGCGGCCGUGG 9153  
4v\_JX227959.1 9100 AAUUGGGCAGUAAAACCAAGCUCUAAACUCACUCCAAUAGCGGCCGUGG 9149  
4v\_HQ537009 9086 AACUGGGCGGUGAAAACCAAGCUCUAAACUCACUCCAAUAGCGGCCGUGG 9135  
5a\_NC\_009826 9127 AACUGGGCGGUGAAGGACAAAGCUCUAAACUCACUCCAAUAGCGGCCGUGG 9176  
5a\_AF064490 9094 AACUGGGCGGUGAAAACCAAGCUCUAAACUCACUCCAAUAGCGGCCGUGG 9143  
6a\_AY859526.1 9158 AACUGGGCGGUGAAGGACCAAAACUCUAAACUCACUCCAAUAGCGGCCGUGG 9207  
6a\_DQ480524.1 9164 AACUGGGCAGUGAGGACCAACUCUAAACUCACUCCAAUAGCGGCCGUGG 9213  
6b\_NC\_009827. 9205 AACUGGGCAGUAAAGGACCAAGCUCUAAACUCACUCCAAUAGCGGCCGUGG 9254  
6b\_D84262.2 9205 AACUGGGCAGUAAAGGACCAAGCUCUAAACUCACUCCAAUAGCGGCCGUGG 9254  
6c\_EF424629.1 9190 AAUUGGGCCGUGAAGGACCAAGCUCUAAACUCACUCCAAUAGCGGCCGUGG 9239  
6d\_D84263.2 9183 AAUUGGGCCGUGAAGGACCAAGCUCUAAACUCACUCCAAUAGCGGCCGUGG 9232  
6e\_EU408326 9210 AACUGGGCGGUGAAGGACCAAGCUCUAAACUCACUCCAAUAGCGGCCGUGG 9259  
6e\_DQ314805.1 9210 AACUGGGCGGUGAAGGACCAAGCUCUAAACUCACUCCAAUAGCGGCCGUGG 9259  
6f\_DQ835764.1 9198 AACUGGGCGGUGAGGACAAAGCUCUAAACUCACUCCAAUAGCGGCCGUGG 9247  
6f\_DQ835760.1 9198 AACUGGGCCGUGAGAACAAAGCUCUAAACUCACUCCAAUAGCGGCCGUGG 9247  
6h\_D84265.2 9189 AAUUGGGCGUAAAAGACCAAAACUCUAAACUCACUCCAAUAGCGGCCGUGG 9238  
6i\_DQ835762.1 9192 AAUUGGGCGGUGAAAACCAAGCUCUAAACUCACUCCAAUAGCGGCCGUGG 9241  
6i\_DQ835770.1 9192 AAUUGGGCGGUGAAAACCAAGCUCUAAACUCACUCCAAUAGCGGCCGUGG 9241  
6j\_DQ835769.1 9192 AACUGGGCGGUGAAAACCAACUCUAAACUCACUCCAAUAGCGGCCGUGG 9241  
6j\_DQ835761.1 9192 AACUGGGCAGUAAAACCAAAACUCUAAACUCACUCCAAUAGCGGCCGUGG 9241  
6k\_JX183552.1 9192 AACUGGGCGGUGAAAACCAAGCUCUAAACUCACUCCAAUAGCGGCCGUGG 9241  
6k\_D84264.2 9192 AACUGGGCAGUAAAGGACCAAGCUCUAAACUCACUCCAAUAGCGGCCGUGG 9241  
6l\_JX183554.1 9192 AACUGGGCAGUGAGGACCAAGCUCUAAACUCACUCCAAUAGCGGCCGUGG 9241  
6l\_EF424628.1 9192 AACUGGGCGGUGAGGACCAAGCUCUAAACUCACUCCAAUAGCGGCCGUGG 9241  
6m\_DQ835765.1 9192 AACUGGGCAGUAAAGCUCUAAAGCUCUAAACUCACUCCAAUAGCGGCCGUGG 9241  
6m\_DQ835767.1 9192 AACUGGGCAGUAAAGCUCUAAAGCUCUAAACUCACUCCAAUAGCGGCCGUGG 9241  
6n\_DQ835768.1 9189 AACUGGGCGGUGAAGGACCAAGCUCUAAACUCACUCCAAUAGCGGCCGUGG 9238  
6n\_EU246937 9164 AACUGGGCUGUGAAGGACAAAGCUCUAAACUCACUCCAAUAGCGGCCGUGG 9213  
6o\_EF424627.1 9192 AACUGGGCUGUGAAGGACAAAGCUCUAAACUCACUCCAAUAGCGGCCGUGG 9241  
6o\_EU408327 9192 AACUGGGCUGUGAAGGACAAAGCUCUAAACUCACUCCAAUAGCGGCCGUGG 9241  
6p\_EF424626.1 9193 AAUUGGGCUGUGAAGGACAAAGCUCUAAACUCACUCCAAUAGCGGCCGUGG 9242  
6q\_EF424625.1 9190 AAUUGGGCGGUGAAGGACAAAGCUCUAAACUCACUCCAAUAGCGGCCGUGG 9239  
6r\_EU408328 9192 AAUUGGGCGGUGAGGACCAAGCUCUAAACUCACUCCAAUAGCGGCCGUGG 9241  
6s\_EU408329 9192 AACUGGGCGGUGAGGACCAAGCUCUAAACUCACUCCAAUAGCGGCCGUGG 9241  
6t\_EF632070.1 9192 AAUUGGGCGGUGAAGGACCAAGCUCUAAACUCACUCCAAUAGCGGCCGUGG 9241  
6t\_EF632069.1 9192 AAUUGGGCGGUGAAGGACCAAGCUCUAAACUCACUCCAAUAGCGGCCGUGG 9241  
6u\_EU246940 9170 AACUGGGCAGUGAAGGACCAAGCUCUAAACUCACUCCAAUAGCGGCCGUGG 9219  
6v\_FJ435090.1 9192 AACUGGGCUGUAAAGGACCAAGCUCUAAACUCACUCCAAUAGCGGCCGUGG 9241  
6v\_EU798760 9192 AACUGGGCUGUAAAGGACCAAGCUCUAAACUCACUCCAAUAGCGGCCGUGG 9241  
7a\_EF108306 9153 AACUGGGCUGUAGGACCAAGUCAAACUCACUCCAAUAGCGGCCGUGG 9202

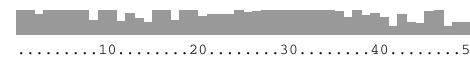

**Supplementary Figure S3 (next page), related to Figure 1 and Supplementary Figure S1**

Sequences with miR-122 site 5B.2. Nucleotide sequences were aligned according to amino acid sequences. Amino acids have been colored individually. Nucleotides are individually colored if more than 50 % conserved. Please note that the miR-122 seed target sequence is shifted by 2 nucleotides in some isolates (compare Supplementary Figure S1). The histogram shows the fraction of nucleotides actually used at each position relative to the number of nucleotides allowed by codon usage.

1. 1a\_M\_0114938489191gfc21489.1  
2. 1a\_M\_012372962161gfc21489.1  
3. 1a\_M\_014021361gfc21489.1  
4. 1a\_M\_0138492201gfc21489.1  
5. 1c\_M\_010232321gfc21489.1  
6. 1c\_M\_010643173gfc21489.1  
7. 1c\_M\_0125146621gfc21489.1  
8. 1g\_M\_01011749591gfc21489.1  
9. 1h\_M\_0125146621gfc21489.1  
10. 1i\_M\_0125146621gfc21489.1  
11. 1j\_M\_0125146621gfc21489.1  
12. 1k\_M\_010105101gfc21489.1  
13. 1l\_M\_01322201gfc21489.1  
14. 1m\_M\_010757411gfc21489.1  
15. 1n\_M\_01086464751gfc21489.1  
16. 1o\_M\_010483431gfc21489.1  
17. 1p\_M\_010514721gfc21489.1  
18. 1q\_M\_010797201gfc21489.1  
19. 1r\_M\_0107972021gfc21489.1  
20. 1s\_M\_0108995321gfc21489.1  
21. 1t\_M\_011130301gfc21489.1  
22. 1u\_M\_010730371gfc21489.1  
23. 1v\_M\_0107972021gfc21489.1  
24. 1w\_M\_010510001gfc21489.1  
25. 1x\_M\_0107972021gfc21489.1  
26. 1y\_M\_0107972021gfc21489.1  
27. 1z\_M\_0107972021gfc21489.1  
28. 1aa\_M\_010514721gfc21489.1  
29. 1ab\_M\_0103174721gfc21489.1  
30. 1ac\_M\_0105144441gfc21489.1  
31. 1ad\_M\_010402021gfc21489.1  
32. 1ae\_M\_01050530521gfc21489.1  
33. 1af\_M\_01078771gfc21489.1  
34. 1ag\_M\_0107972021gfc21489.1  
35. 1ah\_M\_01039514721gfc21489.1  
36. 1ai\_M\_0107972021gfc21489.1  
37. 1aj\_M\_0107972021gfc21489.1  
38. 1ak\_M\_01039514721gfc21489.1  
39. 1al\_M\_0107972021gfc21489.1  
40. 1am\_M\_01059514721gfc21489.1  
41. 1an\_M\_0107972021gfc21489.1  
42. 1ao\_M\_01059514721gfc21489.1  
43. 1ap\_M\_01059514721gfc21489.1  
44. 1aq\_M\_01059514721gfc21489.1  
45. 1ar\_M\_01059514721gfc21489.1  
46. 1as\_M\_01059514721gfc21489.1  
47. 1at\_M\_01059514721gfc21489.1  
48. 1au\_M\_01059514721gfc21489.1  
49. 1av\_M\_01059514721gfc21489.1  
50. 1aw\_M\_01059514721gfc21489.1  
51. 1ax\_M\_01059514721gfc21489.1  
52. 1ay\_M\_01059514721gfc21489.1  
53. 1az\_M\_01059514721gfc21489.1  
54. 1ba\_M\_01059514721gfc21489.1  
55. 1bb\_M\_01059514721gfc21489.1  
56. 1bc\_M\_01059514721gfc21489.1  
57. 1bd\_M\_01059514721gfc21489.1  
58. 1be\_M\_01059514721gfc21489.1  
59. 1bf\_M\_01059514721gfc21489.1  
60. 1bg\_M\_01059514721gfc21489.1  
61. 1bh\_M\_01059514721gfc21489.1  
62. 1bi\_M\_01059514721gfc21489.1  
63. 1bj\_M\_01059514721gfc21489.1  
64. 1bk\_M\_01059514721gfc21489.1  
65. 1bl\_M\_01059514721gfc21489.1  
66. 1bm\_M\_01059514721gfc21489.1  
67. 1bn\_M\_01059514721gfc21489.1  
68. 1bo\_M\_01059514721gfc21489.1  
69. 1bp\_M\_01059514721gfc21489.1  
70. 1bq\_M\_01059514721gfc21489.1  
71. 1br\_M\_01059514721gfc21489.1  
72. 1bs\_M\_01059514721gfc21489.1  
73. 1bt\_M\_01059514721gfc21489.1  
74. 1bu\_M\_01059514721gfc21489.1  
75. 1bv\_M\_01059514721gfc21489.1  
76. 1bw\_M\_01059514721gfc21489.1  
77. 1bx\_M\_01059514721gfc21489.1  
78. 1by\_M\_01059514721gfc21489.1  
79. 1bz\_M\_01059514721gfc21489.1  
80. 1ca\_M\_01059514721gfc21489.1  
81. 1cb\_M\_01059514721gfc21489.1  
82. 1cc\_M\_01059514721gfc21489.1  
83. 1cd\_M\_01059514721gfc21489.1  
84. 1ce\_M\_01059514721gfc21489.1  
85. 1cf\_M\_01059514721gfc21489.1  
86. 1cg\_M\_01059514721gfc21489.1  
87. 1ch\_M\_01059514721gfc21489.1  
88. 1ci\_M\_01059514721gfc21489.1  
89. 1cj\_M\_01059514721gfc21489.1  
90. 1ck\_M\_01059514721gfc21489.1  
91. 1cl\_M\_01059514721gfc21489.1  
92. 1cm\_M\_01059514721gfc21489.1  
93. 1cn\_M\_01059514721gfc21489.1  
94. 1co\_M\_01059514721gfc21489.1  
95. 1cp\_M\_01059514721gfc21489.1  
96. 1cq\_M\_01059514721gfc21489.1  
97. 1cr\_M\_01059514721gfc21489.1  
98. 1cs\_M\_01059514721gfc21489.1  
99. 1ct\_M\_01059514721gfc21489.1  
100. 1cu\_M\_01059514721gfc21489.1  
101. 1cv\_M\_01059514721gfc21489.1  
102. 1cw\_M\_01059514721gfc21489.1  
103. 1cx\_M\_01059514721gfc21489.1  
104. 1cy\_M\_01059514721gfc21489.1  
105. 1cz\_M\_01059514721gfc21489.1  
106. 1da\_M\_01059514721gfc21489.1

**Supplementary Figure S4 (next page), related to Figure 1 and Supplementary Figure S2**

Sequences with miR-122 site 5B.3. Nucleotide sequences were aligned according to amino acid sequences. Nucleotides are colored individually when more than 50 % conserved. Amino acids are colored individually. The histogram shows the fraction of nucleotides actually used at each position relative to the number of nucleotides allowed by codon usage.





**Supplementary Figure S5 (next page), related to Figure 1**

miR-122 and the conserved miR-122 target site S3 in 93 selected HCV NS5B sequences (Fricke et al. 2015). The miR-122 sequence with the seed sequence (nts 2 – 8) and the supplementary binding region (nts 17 – 20) are marked in red. Gaps were introduced to align seed target sequences. HCV genotype and NCBI nucleotide database accession numbers are given on the left, nucleotide numbers are shown for each isolate. The miR-122 seed target site (A)CACUCC is 100 % conserved in 85 of 94 isolates, the supplementary binding site is conserved in 92/94 isolates. Below the sequences, the histogram shows the conservation of each residue.

miR-122 3' - GU UUGU GGUAACAG U - 5' seed region

ARG stop

Table with 3 columns: Accession ID, Gene Name, and Sequence. The table lists various miR-122 target sequences and their corresponding gene names (e.g., Con1, JFH1). The sequences are aligned to the miR-122 seed region, with positions 1-50 indicated at the bottom.

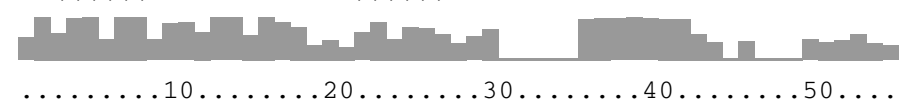

## Supplementary Figure S6

### RNAs used in binding experiments

Structures of RNAs used in binding experiments were predicted using the Vienna **RNAfold** WebServer (<http://rna.tbi.univie.ac.at/cgi-bin/RNAfold.cgi>) (Gruber et al., 2008; Lorenz et al., 2011).

Options were set as follows: Basic options: "avoid isolated base pairs". Advanced folding options were: "no dangling end energies" with the Turner model, 2004.

The Vienna RNA structure prediction output is shown in dot-bracket form. Seed binding sites and supplemental binding sites for microRNA-122 are labelled in yellow.

The origin of the templates for PCR and those nucleotides of the PCR primers that are contained in the in vitro-transcribed RNA are listed below each sequence. Here we show only those sequences of the primers which became part of the RNA; upstream of the forward primer there was always a T7 promoter included in the primer. With most forward primers, three G residues were added to the sequence to improve T7 RNA polymerase-mediated in vitro transcription of the RNAs.





**RNAs for Site 5B.2 - Alignment**

CLUSTAL format alignment by MAFFT (v7.304b)

```
RNA_5B.2a_Con1_ -----GGGGUGGGA GACAGCUAGAC ACACUCC--AGUCAAUUCCUGGC
RNA_5B.2a_JFH1_ -----GGGA AACAGUUAG--ACACUCC CUAUCAAUUCAUGGC
RNA_5B.2b_Con1_ -----GGGUGCGUGGGA GACAGCUAGAC ACACUCC--AGUCAAUUCCUGGC
RNA_5B.2b_JFH1_ -----GGGA AACAGUUAG--ACACUCC CUAUCAAUUCAUGGC
RNA_5B.2c_Con1_ -----GGGCGUGGGA GACAGCUAGAC ACACUCC--AGUCAAUUCCUGGC
RNA_5B.2d_JFH1_ GGGCCACUCGCCCGGCCUGCCUGGGA AACAGUUAG--ACACUCC CUAUCAAUUCAUGGC
                                     **** .**** * * ***** ***** ****
```

```
RNA_5B.2a_Con1_ UAGGCAACAUCAUCAUGUAUGCGCCCACCUUGUGGGCAAGGAUGAUCCUGAUGACUCAUU
RNA_5B.2a_JFH1_ UGGGAAACAUCAUCCAGUAUGCUCCAACCAUAUGGGUUCGCAUGGUCCUAUGACACACU
RNA_5B.2b_Con1_ UAGGCAACAUCAUCAUGUAUGCGCCCACCUUGUGGGCAAGGAUGAUCCUGAUGACUCAUU
RNA_5B.2b_JFH1_ UGGGAAACAUCAUCCAGUAUGCUCCAACCAUAUGGGUUCGCAUGGUCCUAUGACACACU
RNA_5B.2c_Con1_ UAGGCAACAUCAUCAUGUAUGCGCCCACCUUGUGGGCAAGGAUGAUCCUGAUGACUCAUU
RNA_5B.2d_JFH1_ UGGGAAACAUCAUCCAGUAUGCUCCAACCAUAUGGGUUCGCAUGGUCCUAUGACACACU
* . ** ***** ***** * * * * .***** * * * .***** .***** * * *
```

```
RNA_5B.2a_Con1_ UCUUCUCCAUCUUCUAGCUCAGGAACAACUUGAAAAAGCCCUAGAUUGUCAGAUCUACG
RNA_5B.2a_JFH1_ UCUUCUCCAUCUUCUAGGUCCAAGACACCCUGGACCAGAACCUCAACUUGAGAUGUAUG
RNA_5B.2b_Con1_ UCUUCUCCAUCUUCUAGCUCAGGAACAACUUGAAAAAGCCCUA-----
RNA_5B.2b_JFH1_ UCUUCUCCAUCUUCUAGGUCCAAGACACCCUGGACCAGAACCUCAACUUGAGAUGUAUG
RNA_5B.2c_Con1_ UCUUCUCCAUCUUCUAGCUCAGGAACAACUUGAAAAAGCCCUAGAUUGU-----
RNA_5B.2d_JFH1_ UCUUCUCCAUCUUCUAGGUCCAAGACACCCUGGACCAGAACC-----
***** ** * . * ** . * * * * * * * * . . **
```

```
RNA_5B.2a_Con1_ GGGCCUGUUAUCUUAUGAGCCACUUGACCUACCUCAGAUCAUUAACGACUCCAUGGCC
RNA_5B.2a_JFH1_ GAUCAGUAUACUCCGUGAAUCCUUGGACCUUCCAGCCAUAUUAUGAGAGGUUACACGGGC
RNA_5B.2b_Con1_ -----
RNA_5B.2b_JFH1_ GAUCAGUAUACUCCGUGAAUCCUUGGACCUUCCAGCCAUAUUAUGAGAGGUUACACGGGC
RNA_5B.2c_Con1_ -----
RNA_5B.2d_JFH1_ -----
```

```
RNA_5B.2a_Con1_ UUAGCG-----
RNA_5B.2a_JFH1_ UUGACGCCUJUUCUAUGCACACAUACUCUCACCACGAACUGACGCGGGUGG-----
RNA_5B.2b_Con1_ -----
RNA_5B.2b_JFH1_ UUGACGCCUJUUCUAUGCACACAUACUCUCACCACGAACUGACGCGGGUGGCUUCAGCCC
RNA_5B.2c_Con1_ -----
RNA_5B.2d_JFH1_ -----
```

```
RNA_5B.2a_Con1_ -----
RNA_5B.2a_JFH1_ -----
RNA_5B.2b_Con1_ -----
RNA_5B.2b_JFH1_ UCAGAAAACUUGGGG
RNA_5B.2c_Con1_ -----
RNA_5B.2d_JFH1_ -----
```

**RNAs for Site 5B.3 - Secondary structure predictions**

RNA\_5B.3a\_Con1\_226\_nts

GGGGGCUACUGUCCAGGGGGGGAGGGCUGCCACUUGUGGCAAGUACCUCUUAACUGGGCAGUAAGGACCAAGCUCAAACU  
CACUCCAAUCCCGGCUGCGUCCAGUUGGAUUUAUCCAGCUGGUUCGUUCUGGUUACAGCGGGGGAGACAUUAUACACAGC  
CUGUCUCGUGCCCGACCCCGCUGGUUCAUGUGGUGCCUACUCCUACUUUCUGUAGGGGUAGG  
..(((.....)))).  
(((.....)))).

Template: HCV genotype 1b Con1 (AJ238799.1)  
Primer fwd: 5'-GGGGGCTACTGTCCCAGGG-3'  
Primer rev: 5'-CCTACCCCTACAGAAAGTAGGAGTAGGCAC-3'

RNA\_5B.3a\*\_JFH1\_200\_nts

GGGCGGUGAAGACCAAGCUCAAACU CACUCCAUUUGCCGGAGGGCGCGCCUACUGGACUUAUCCAGUUGGUUCACCGUCGGCGC  
CGGCGGGGGCGACAUUUUUCACAGCGUGUCGCGCGCCCGACCCCGCUCAUUACUCUUCGGCCUACUCC  
UACUUUUCGUAGGGGUAGGCCUCUCCUACUCCCGCUCGGUAGAGCGGC  
(((.....)))).  
.....  
(((.....)))).

Template: HCV genotype 2a JFH-1 (AB047639.1)  
Primer fwd: 5'-GGGCGGTGAAGACCAAGCTCAAACCTACTCCATTG-3'  
Primer rev: 5'-GCCGCTCTACCGAGCGGGGAGTAGG-3'

RNA\_5B.3b\_JFH1\_196\_nts

GGGCGGUGAAGACCAAGCUCAAACU CACUCCAUUUGCCGGAGGGCGCGCCUACUGGACUUAUCCAGUUGGUUCACCGUCGGCGC  
CGGCGGGGGCGACAUUUUUCACAGCGUGUCGCGCGCCCGACCCCGCUCAUUACUCUUCGGCCUACUCCUACUUUUCGUAGGG  
GUAGGCCUCUCCUACUCCCGCUCGGUAGAG  
(((.....)))).  
.....  
(((.....)))).

Template: HCV genotype 2a JFH-1 (AB047639.1)  
Primer fwd: 5'-GGGCGGTGAAGACCAAGCTCAAACCTACTCCATTG-3'  
Primer rev: 5'-CTCTACCGAGCGGGGAGTAGGAAGAGGCC-3'

RNA\_5B.3c\_JFH1\_224\_nts

GGGUCAUCUCCCGUGGAGGGAAAGCGGCCGUUUGCGGCCGAUAUCUCUUAUUGGGCGGUGAAGACCAAGCUCAAACU CAC  
UCCAUUUGCCGGAGGGCGCGCCUACUGGACUUAUCCAGUUGGUUCACCGUCGGCGCCGGCGGGGGCGACAUUUUUCACAGCGUG  
UCGCGCGCCCGACCCCGCUCAUUACUCUUCGGCCUACUCCUACUUUUCGUAGGGGUAGG  
(((.....)))).  
.....  
(((.....)))).

Template: HCV genotype 2a JFH-1 (AB047639.1)  
Primer fwd: 5'-GGGTCATCTCCCGTGGAGG-3'  
Primer rev: 5'-GCCTACCCCTACGAAAAGTAGGAGTAGGCCG-3'









**FASTA compatible format**

>RNA\_5B.2a\_Con1\_227\_nts  
GGGGUGGGAGACAGCUAGACACACUCCAGUCAAUUCCUGGCUAGGCAACAUCAUCAUGUAUGCGCCACCUUGUGGGCAAGG  
AUGAUCCUGAUGACUCAUUCUUCUCCAUCCUUCUAGCUCAGGAACAACUUGAAAAAGCCCUAGAUUGUCAGAUUCACGGGG  
CCUGUUAUCUCAUUGAGCCACUUGACCUCACUAGAUCAUUAACGACUCCAUGGCCUUAGCG

>RNA\_5B.2a\*\_JFH1\_267\_nts  
GGGAAACAGUUAGACACUCCCCUAUCAAUUCAUGGCUGGGAAACAUCAUCCAGUAUGCUCCAACCAUAUGGGUUCGCAUGGU  
CCUAAUGACACACUUCUUCUCCAUUCUCAUGGUCCAAGACACCCUGGACCAGAACCUCAACUUUGAGAUGUAUGGAUCAGUA  
UACUCCGUGAAUCCUUUGGACCUCCAGCCAUAUUUGAGAGGUUACACGGGCUUGACGCCUUUUCUAUGCACACAUAUCUCUC  
ACCACGAACUGACGCGGGUGG

>RNA\_5B.2b\_Con1\_148\_nts  
GGGUGCGUGGGAGACAGCUAGACACACUCCAGUCAAUUCCUGGCUAGGCAACAUCAUCAUGUAUGCGCCACCUUGUGGGCA  
AGGAUGAUCCUGAUGACUCAUUCUUCUCCAUCCUUCUAGCUCAGGAACAACUUGAAAAAGCCCUA

>RNA\_5B.2b\*\_JFH1\_291\_nts  
GGGAAACAGUUAGACACUCCCCUAUCAAUUCAUGGCUGGGAAACAUCAUCCAGUAUGCUCCAACCAUAUGGGUUCGCAUGGU  
CCUAAUGACACACUUCUUCUCCAUUCUCAUGGUCCAAGACACCCUGGACCAGAACCUCAACUUUGAGAUGUAUGGAUCAGUA  
UACUCCGUGAAUCCUUUGGACCUCCAGCCAUAUUUGAGAGGUUACACGGGCUUGACGCCUUUUCUAUGCACACAUAUCUCUC  
ACCACGAACUGACGCGGGUGGCUUCAGCCUCAGAAAACUUGGGG

>RNA\_5B.2c\_Con1\_152\_nts  
GGGCGUGGGAGACAGCUAGACACACUCCAGUCAAUUCCUGGCUAGGCAACAUCAUCAUGUAUGCGCCACCUUGUGGGCAAG  
GAUGAUCCUGAUGACUCAUUCUUCUCCAUCCUUCUAGCUCAGGAACAACUUGAAAAAGCCCUAGAUUGU

>RNA\_5B.2d\_JFH1\_160\_nts  
GGGCCACUCGCCCAGGCGGCCUGGAAACAGUUAGACACUCCCCUAUCAAUUCAUGGCUGGGAAACAUCAUCCAGUAUGCUC  
CAACCAUAUGGGUUCGCAUGGUCCUAAUGACACACUUCUUCUCCAUUCUCAUGGUCCAAGACACCCUGGACCAGAACC

>RNA\_5B.3a\_Con1\_226\_nts  
GGGGGCUACUGUCCCAGGGGGGGAGGGCUGCCACUUGUGGCAAGUACCUCUUAACUGGGCAGUAAGGACCAAGCUCAAACU  
CACUCCAUAUCCCGGCGUGCGUCCCAGUUGGAUUAUCCAGCUGGUUCGUUGCUGGUUACAGCGGGGGAGACAUUAUACAGC  
CUGUCUCGUGCCCAGCCCGCUGGUUCAUGUGGUGCCUACUCCUACUUCUGUAGGGGUAGG

>RNA\_5B.3a\*\_JFH1\_200\_nts  
GGGCGGUGAAGACCAAGCUCAAACUCACUCCAUUGCCGGAGGCGCGCCUACUGGACUUAUCCAGUUGGUUCACCGUCGGCGC  
CGGCGGGGGCGACAUUUUUUCACAGCGUGUCGCGCGCCCGACCCCGCUCAUUACUCUUCGGCCUACUCCUACUUUUCGUAGGG

>RNA\_5B.3b\_JFH1\_196\_nts  
GGGCGGUGAAGACCAAGCUCAAACUCACUCCAUUGCCGGAGGCGCGCCUACUGGACUUAUCCAGUUGGUUCACCGUCGGCGC  
CGGCGGGGGCGACAUUUUUUCACAGCGUGUCGCGCGCCCGACCCCGCUCAUUACUCUUCGGCCUACUCCUACUUUUCGUAGGG  
GUAGGCCUCUCCUACUCCCCGUCGGUAGAG

>RNA\_5B.3c\_JFH1\_224\_nts  
GGGUCAUUCUCCCGUGGAGGAAAGCGGCCGUUUGCGGCCGAUAUCUCUUAUUGGGCGGUGAAGACCAAGCUCAAACUCAC  
UCCAUUGCCGGAGGCGCGCCUACUGGACUUAUCCAGUUGGUUCACCGUCGGCGCCGGCGGGGGCGACAUUUUUUCACAGCGUG  
UCGCGCGCCCGACCCCGCUCAUUACUCUUCGGCCUACUCCUACUUUUCGUAGGGGUAGGC

>RNA\_S3a\_Con1\_250\_nts  
GGGCCGAUGAACGGGAGCUAAACACUCCAGGCCAAUAGGCCAUCCUGUUUUUUUUUUUUUUUUUUUUUUUUUUUUUUUUUUUU  
UUUUUUUUUUUUUUUUUUUUUUUUUUUUUUUUUUUUUUUUUUUUUUUUUUUUUUUUUUUUUUUUUUUUUUUUUUUUUUUUUUUU  
GUCACGGCUCAGCUGUGAAAGGUCCGUGAGCCGCUUGACUGCAGAGAGUGCUGAUACUGGCCUCUCUGCAGAUCAAGUACUAC  
UAGU

>RNA\_S3b\_JFH1\_252\_nts  
GGGUCCCCGUCGCGUAGAGCGGCACACUAGGUACACUCCAUAGCUAACUGUCCUUUUUUUUUUUUUUUUUUUUUUUUUUUUUUUU  
UUUUUUUUUUUUUUUUUUUUUUUUUUUUUUUUUUUUUUUUUUUUUUUUUUUUUUUUUUUUUUUUUUUUUUUUUUUUUUUUUUUU  
AUCUAGCCUAGUCACGGCUCAGCUGUGAAAGGUCCGUGAGCCGCAUGACUGCAGAGAGUGCCGUAACUGGUCUCUCUGCAG  
AUCAUG

> RNA\_S3b\*\_Con1\_153\_nts

GGGCAGCGGGGAGACAUUAUACACAGCCUGUCUCGUGCCCGACCCCGCUGGUUCAUGUGGUGCCUACUCCUACUUUCUGUA  
GGGGUAGGCAUCUAUCUACUCCCCAACCGAUGAACGGGGAGCUAAACACUCCAGGCCAAUAGGCCAUCCUG

>RNA\_S3c\_JFH1\_149\_nts

GGGUCGGCGCCGGCGGGGGCGACAUUUUUACACAGCGUGUCGCGCGCCCGACCCCGCUCAUUACUCUUCGGCCUACUCCUACU  
UUUCGUAGGGGUAGGCCUCUCCUACUCCCCGUCGGUAGAGCGGCACACACUAGGUACACUCCAUA

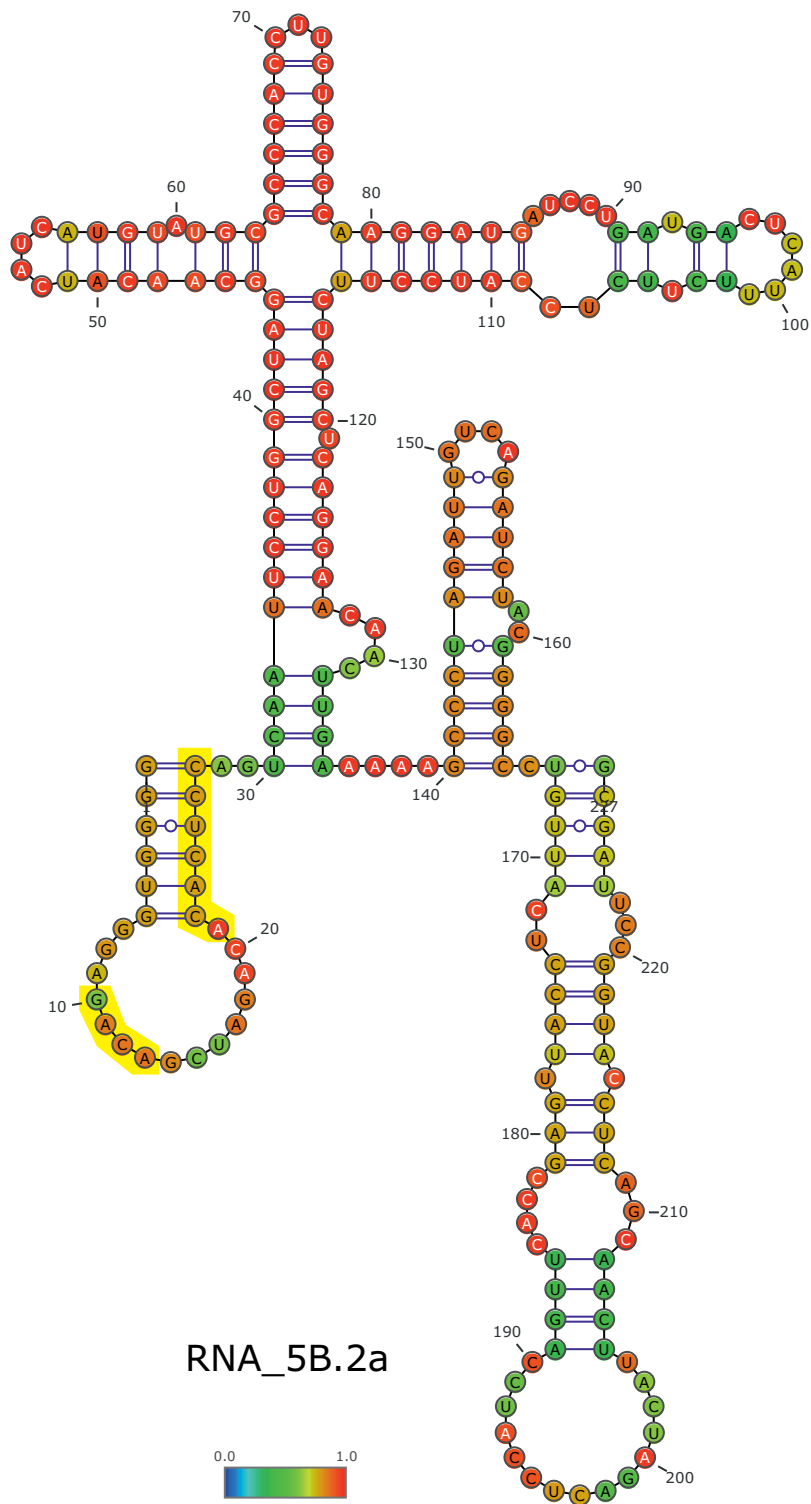

### Supplementary Figure S7, related to Figure 3

Predicted target RNA minimum free energy (MFE) structures. Primers for transcription template production, RNA sequences and Vienna dot bracket outputs are shown in Supplementary Figure S6. Base pair probability (bpp) values were loaded into VARNAv3-92 (Darty et al. 2009) from the Vienna dot plot EPS file output (Gruber et al. 2008; Lorenz et al. 2011), and the bpp color code was set to Vienna style. The Vienna MFE output returns bpp values for bases predicted to pair, but single strand probabilities ( $ssp = 1 - bpp$ ) for bases predicted to be unpaired.

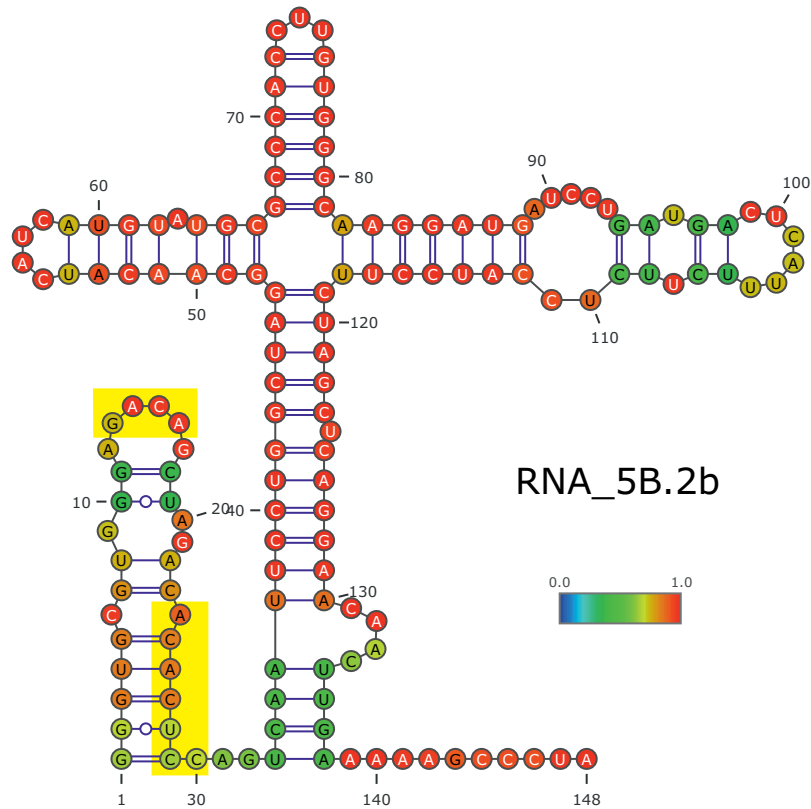

### Supplementary Figure S8, related to Figure 3

Predicted target RNA minimum free energy (MFE) structures. Primers for transcription template production, RNA sequences and Vienna dot bracket outputs are shown in Supplementary Figure S6. Base pair probability (bpp) values were loaded into VARNAv3-92 (Darty et al. 2009) from the Vienna dot plot EPS file output (Gruber et al. 2008; Lorenz et al. 2011), and the bpp color code was set to Vienna style. The Vienna MFE output returns bpp values for bases predicted to pair, but single strand probabilities ( $ssp = 1 - bpp$ ) for bases predicted to be unpaired.

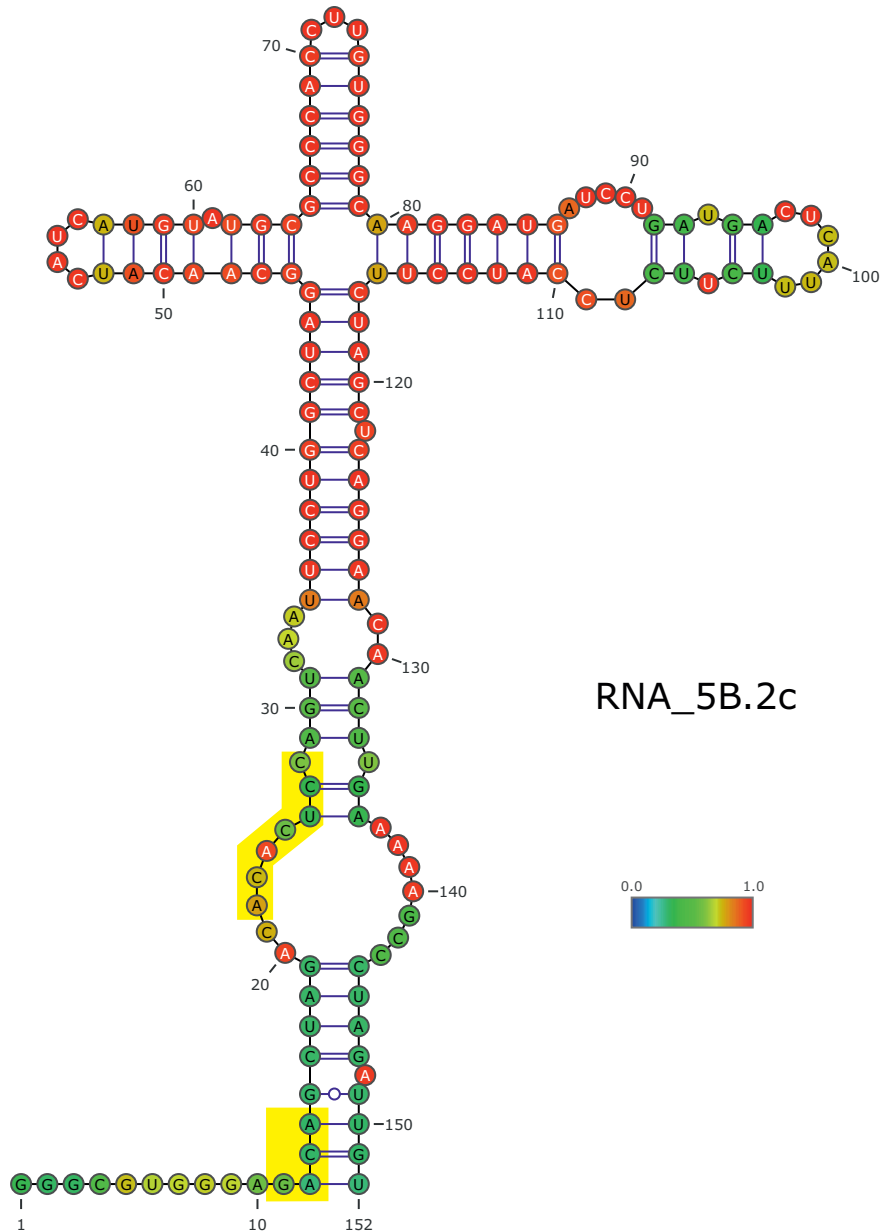

### Supplementary Figure S9, related to Figure 3

Predicted target RNA minimum free energy (MFE) structures. Primers for transcription template production, RNA sequences and Vienna dot bracket outputs are shown in Supplementary Figure S6. Base pair probability (bpp) values were loaded into VARNAv3-92 (Darty et al. 2009) from the Vienna dot plot EPS file output (Gruber et al. 2008; Lorenz et al. 2011), and the bpp color code was set to Vienna style. The Vienna MFE output returns bpp values for bases predicted to pair, but single strand probabilities ( $ssp = 1 - bpp$ ) for bases predicted to be unpaired.



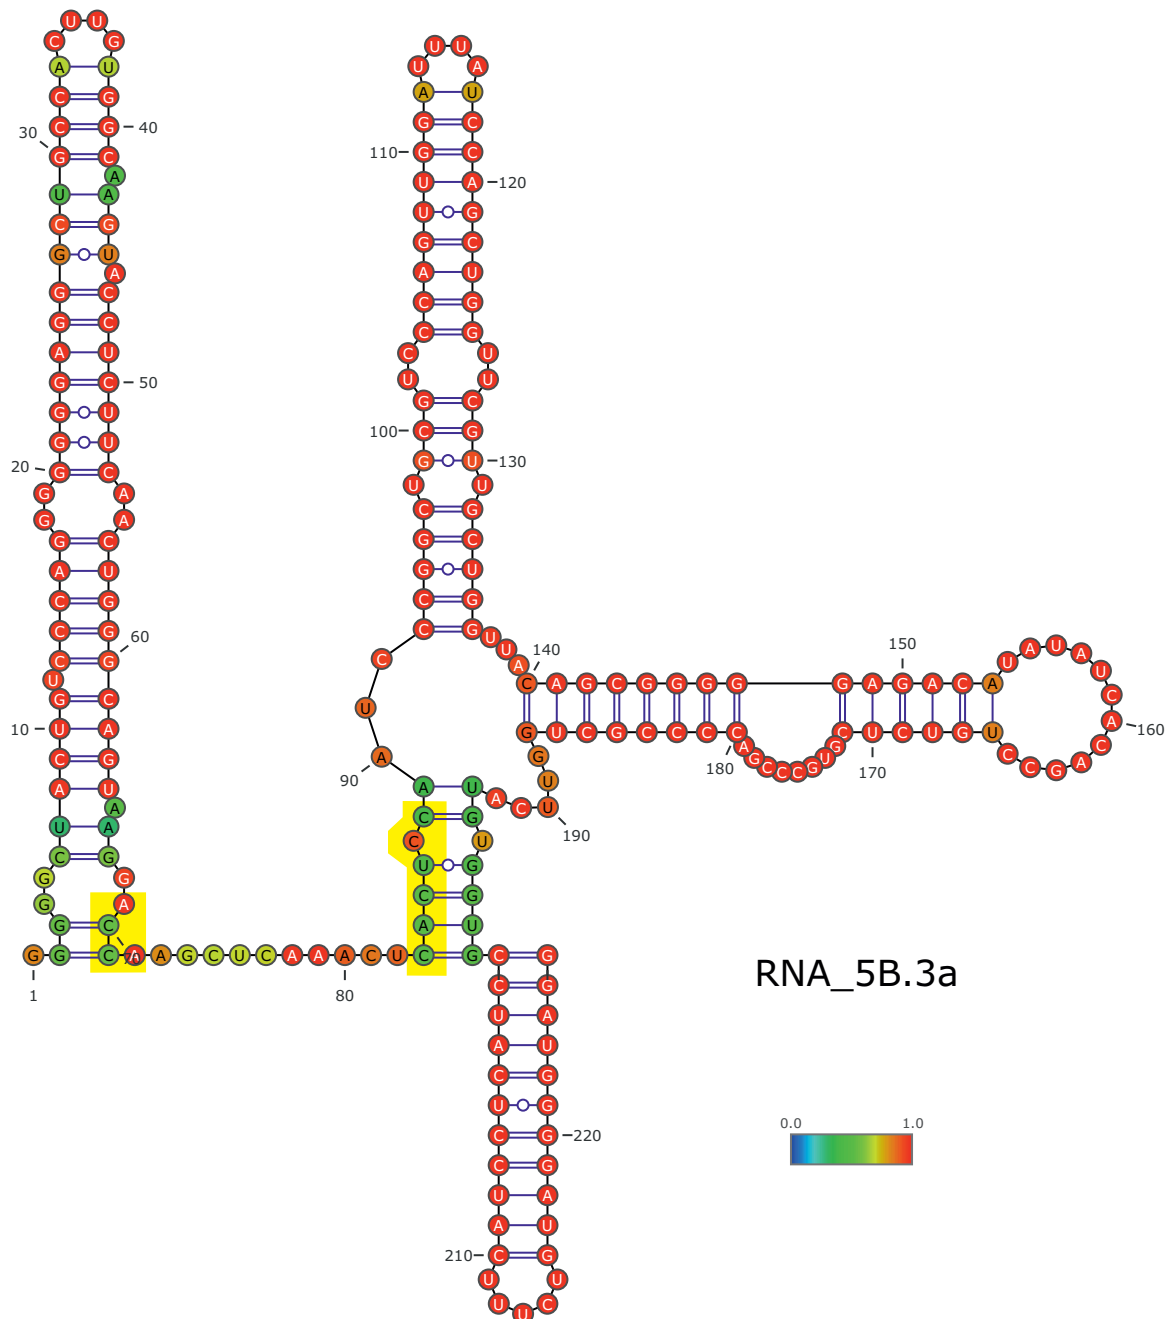

### Supplementary Figure S10, related to Figure 4

Predicted target RNA minimum free energy (MFE) structures. Primers for transcription template production, RNA sequences and Vienna dot bracket outputs are shown in Supplementary Figure S6. Base pair probability (bpp) values were loaded into VARNAv3-92 (Darty et al. 2009) from the Vienna dot plot EPS file output (Gruber et al. 2008; Lorenz et al. 2011), and the bpp color code was set to Vienna style. The Vienna MFE output returns bpp values for bases predicted to pair, but single strand probabilities ( $ssp = 1 - bpp$ ) for bases predicted to be unpaired.

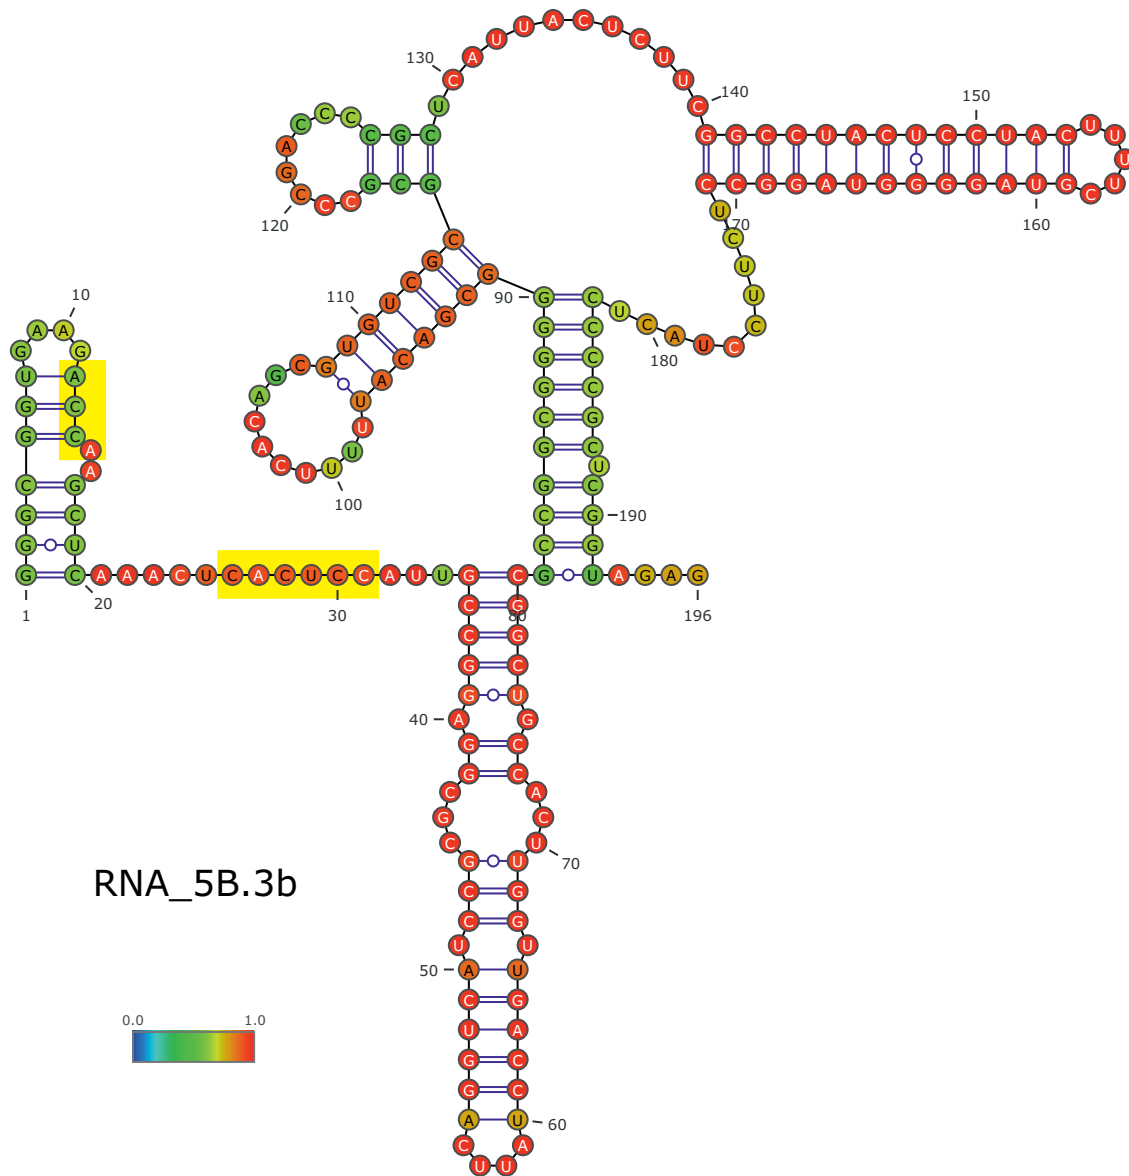

### Supplementary Figure S11, related to Figure 4

Predicted target RNA minimum free energy (MFE) structures. Primers for transcription template production, RNA sequences and Vienna dot bracket outputs are shown in Supplementary Figure S6. Base pair probability (bpp) values were loaded into VARNAv3-92 (Darty et al. 2009) from the Vienna dot plot EPS file output (Gruber et al. 2008; Lorenz et al. 2011), and the bpp color code was set to Vienna style. The Vienna MFE output returns bpp values for bases predicted to pair, but single strand probabilities ( $ssp = 1 - bpp$ ) for bases predicted to be unpaired.

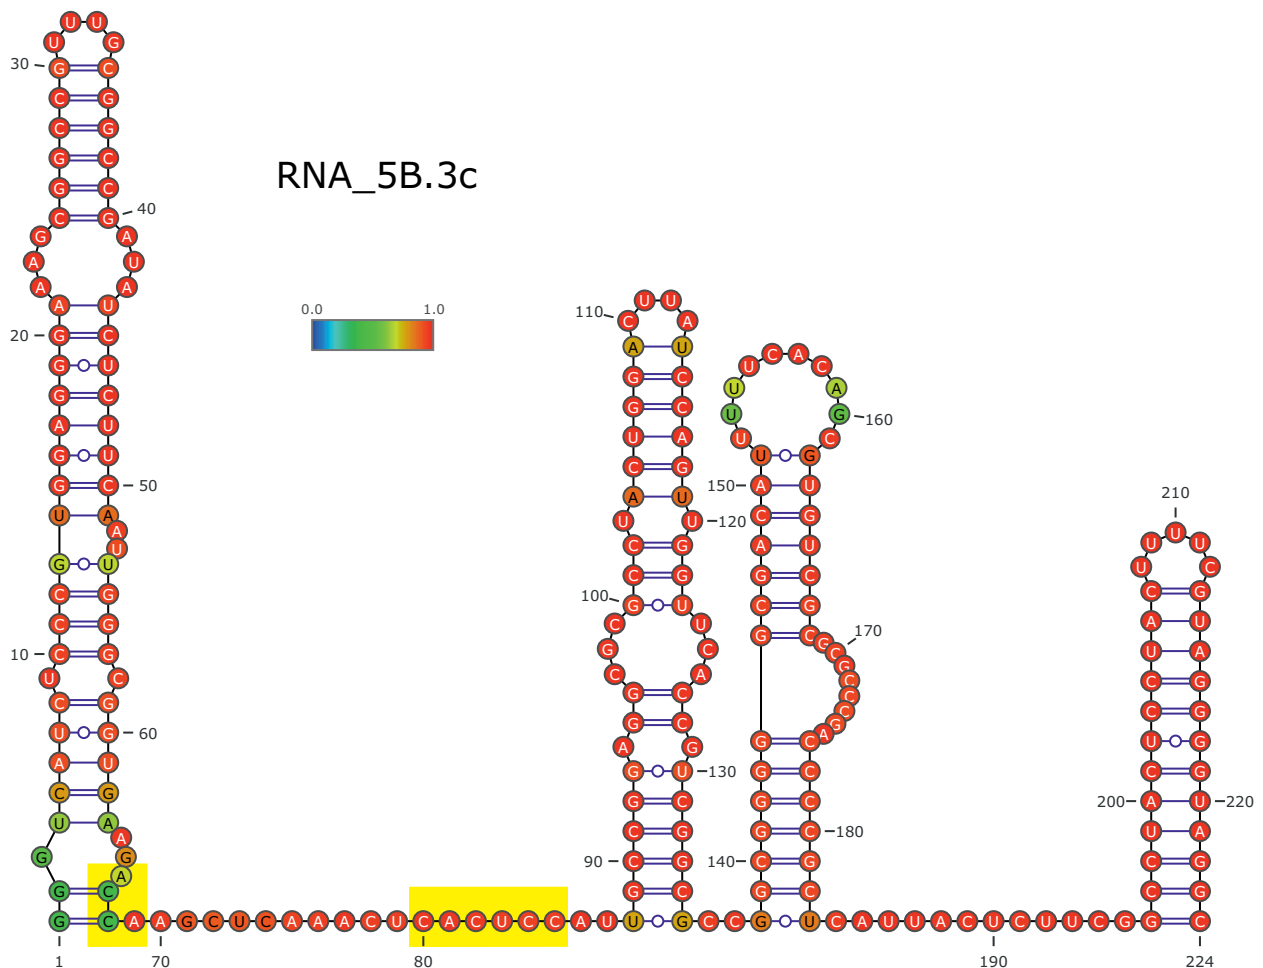

### Supplementary Figure S12, related to Figure 4

Predicted target RNA minimum free energy (MFE) structures. Primers for transcription template production, RNA sequences and Vienna dot bracket outputs are shown in Supplementary Figure S6. Base pair probability (bpp) values were loaded into VARNA<sub>v3-92</sub> (Darty et al. 2009) from the Vienna dot plot EPS file output (Gruber et al. 2008; Lorenz et al. 2011), and the bpp color code was set to Vienna style. The Vienna MFE output returns bpp values for bases predicted to pair, but single strand probabilities ( $ssp = 1 - bpp$ ) for bases predicted to be unpaired.

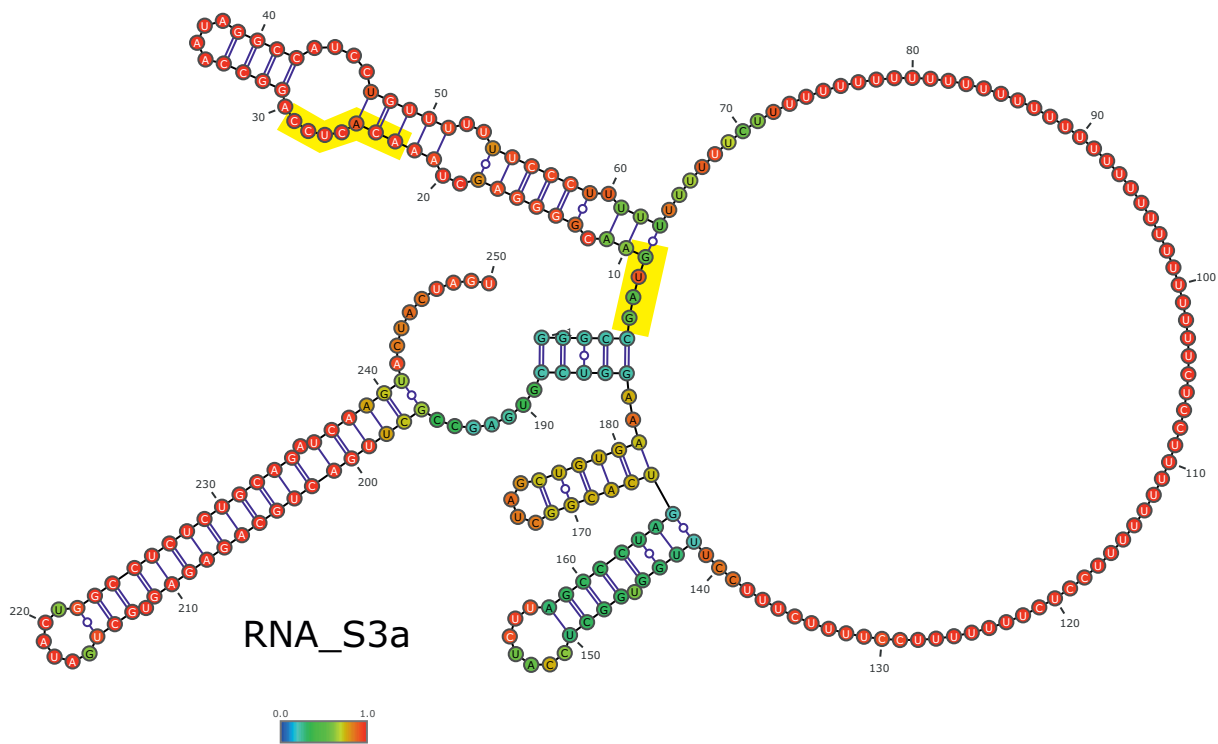

### Supplementary Figure S13, related to Figure 5

Predicted target RNA minimum free energy (MFE) structures. Primers for transcription template production, RNA sequences and Vienna dot bracket outputs are shown in Supplementary Figure S6. Base pair probability (bpp) values were loaded into VARNAv3-92 (Darty et al. 2009) from the Vienna dot plot EPS file output (Gruber et al. 2008; Lorenz et al. 2011), and the bpp color code was set to Vienna style. The Vienna MFE output returns bpp values for bases predicted to pair, but single strand probabilities ( $ssp = 1 - bpp$ ) for bases predicted to be unpaired.



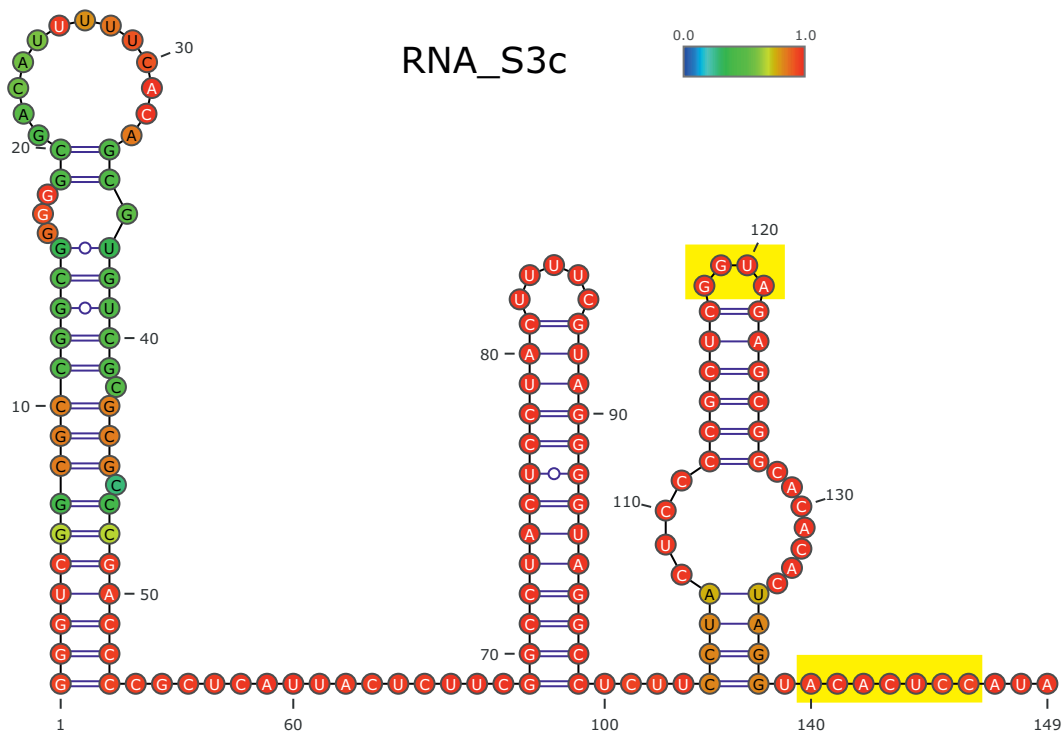

### Supplementary Figure S15, related to Figure 5

Predicted target RNA minimum free energy (MFE) structures. Primers for transcription template production, RNA sequences and Vienna dot bracket outputs are shown in Supplementary Figure S6. Base pair probability (bpp) values were loaded into VARNAv3-92 (Darty et al. 2009) from the Vienna dot plot EPS file output (Gruber et al. 2008; Lorenz et al. 2011), and the bpp color code was set to Vienna style. The Vienna MFE output returns bpp values for bases predicted to pair, but single strand probabilities ( $ssp = 1 - bpp$ ) for bases predicted to be unpaired.

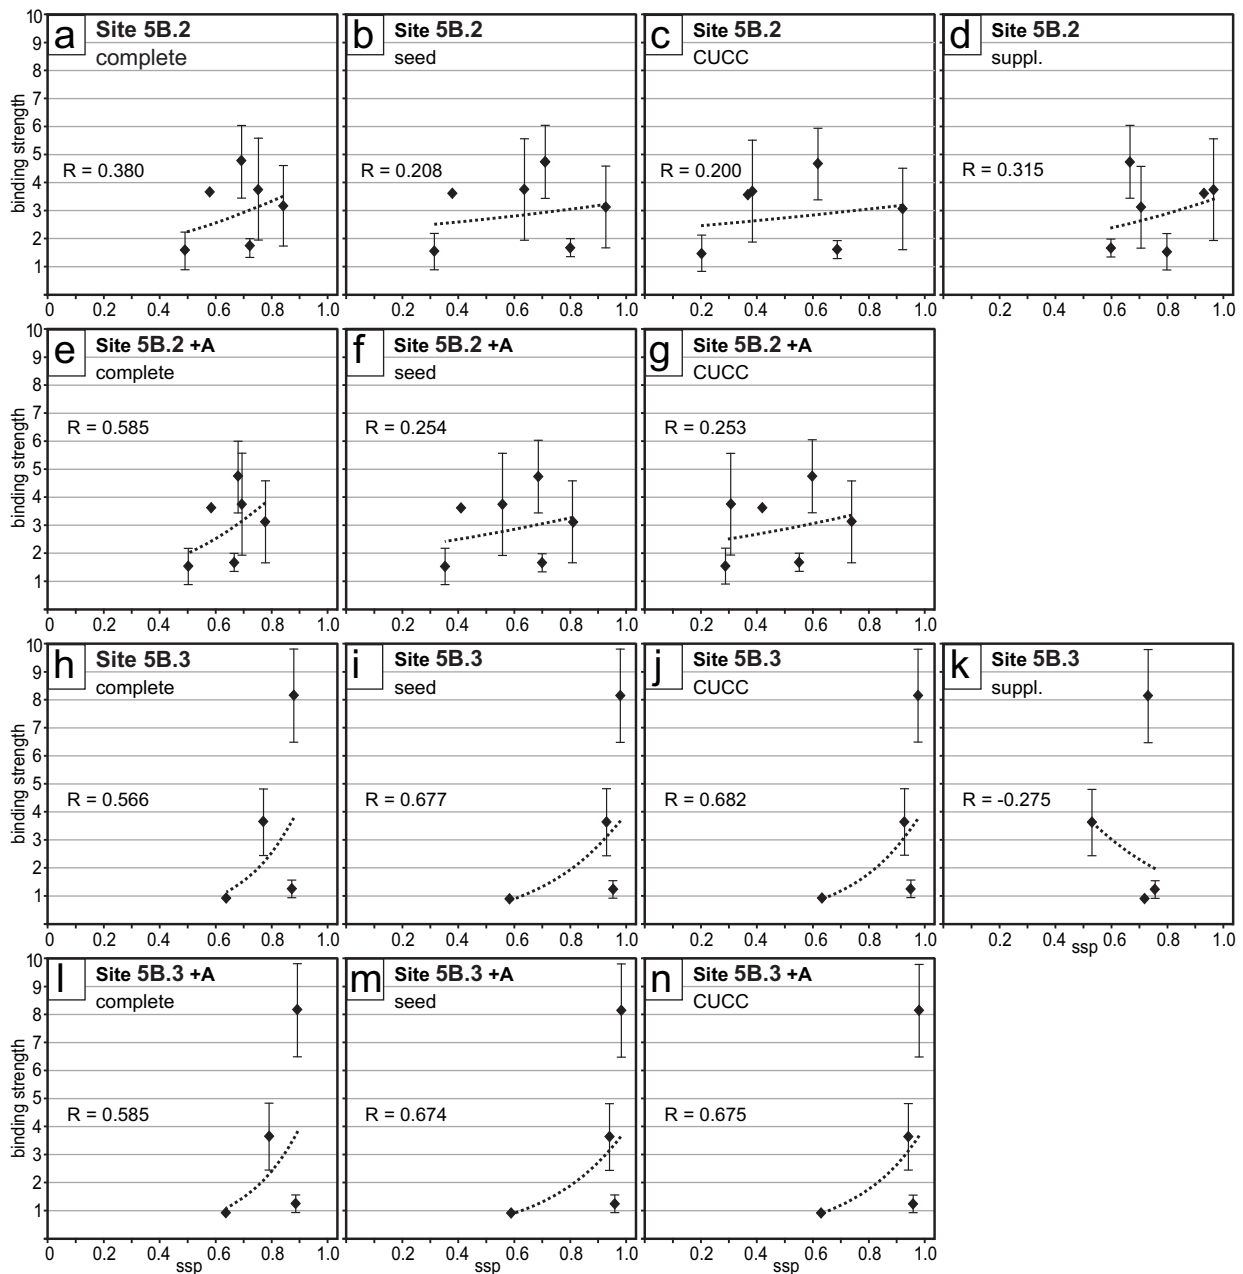

### Supplementary Figure S16, related to Figures 3 - 5

The intensity of miR-122/Ago2 complex binding to NS5B target sites plotted against target site accessibility. The intensity of miR-122/Ago2 complex binding to each target site was calculated from the phosphorimager scans (examples shown in Figures 2, 3 and 4) and several additional experiments using all RNAs listed in Supplementary Figure 6. Binding strength was plotted against single strand probability (ssp) values (calculated as described in Materials and Method). Error bars indicate standard deviations. "R" values are correlation coefficients for regression curves. Panels show plots against average single strand probabilities of the complete target site and separately for seed sequence, nucleotides opposite nucleotides 2 – 5 of the miRNA ("CUCC") and for the supplementary site as indicated. The A residue was additionally included in the calculations in plots labeled "+A".

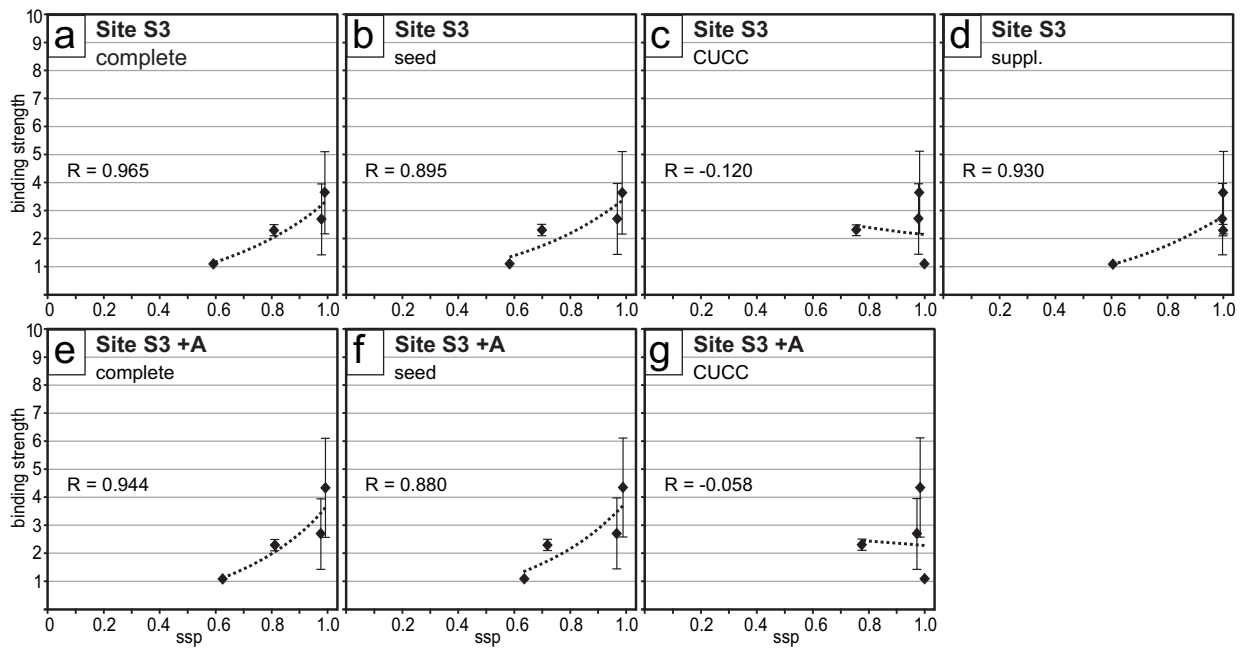

### Supplementary Figure S17, related to Figures 3 - 5

The intensity of miR-122/Ago2 complex binding to 3'UTR S3 target site plotted against target site accessibility. The intensity of miR-122/Ago2 complex binding to each target site was calculated from the phosphorimager scans (examples shown in Figures 2, 3 and 4) and several additional experiments using all RNAs listed in Supplementary Figure 6. Binding strength was plotted against single strand probability (ssp) values (calculated as described in Materials and Method). Error bars indicate standard deviations. "R" values are correlation coefficients for regression curves. Panels show plots against average single strand probabilities of the complete target site and separately for seed sequence, nucleotides opposite nucleotides 2 – 5 of the miRNA ("CUCC") and for the supplementary site as indicated. The A residue was additionally included in the calculations in plots labeled "+A".



## REFERENCES

- Darty, K, Denise, A and Ponty, Y (2009) VARNA: Interactive drawing and editing of the RNA secondary structure. *Bioinformatics*, 25:1974-1975.
- Fricke, M, Dünnes, N, Zayas, M, Bartenschlager, R, Niepmann, M and Marz, M (2015) Conserved RNA secondary structures and long-range interactions in Hepatitis C Viruses. *RNA*, 21:1219-1232.
- Gruber, AR, Lorenz, R, Bernhart, SH, Neubock, R and Hofacker, IL (2008) The Vienna RNA websuite. *Nucleic Acids Res.*, 36, W70-74.
- Lorenz, R, Bernhart, SH, Honer Zu Siederdisen, C, Tafer, H, Flamm, C, Stadler, PF and Hofacker, IL (2011) ViennaRNA Package 2.0. *Algorithms for Molecular Biology: AMB*, 6:26.
